# Supplementary material for: Diagnostic test accuracy for cessation of circulation during death determination: a systematic review
Source: Springer Nature journal article supplement (doi:10.1007/s12630-023-02424-3), 2023-04-01
Supplement: MOESM1 [file 25314350]

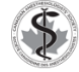

## ELECTRONIC SUPPLEMENTARY MATERIAL

### **Klowak JA *et al.*: Diagnostic test accuracy for cessation of circulation during death determination: a systematic review**

*Disclaimer: Electronic Supplementary Material (ESM) is supplied by the authors for the benefit of readers. This feature is intended to provide additional information, context, and/or dimension to complement articles. Readers should be aware that unlike the main print manuscript, ESM may not undergo extensive peer review and typically is posted as supplied by the authors without editing, proofreading, accuracy checking, copyediting, or typesetting; it is published online only.*

#### TABLE OF CONTENTS

- eAppendix 1** Search strategy for MEDLINE
- eAppendix 2** Search strategy for Embase
- eAppendix 3** Search strategy for Cochrane Central Register of Controlled Trials
- eAppendix 4** Search strategy for Web of Science Core Collection
- eAppendix 5** PRISMA 2020 Main Checklist
- eAppendix 6** PRISMA 2020 Abstract Checklist
- eAppendix 7** Bibliography
- eAppendix 8** Data abstraction of Blaivas 2008
- eAppendix 9** Data abstraction of Caccioppola *et al.* 2018
- eAppendix 10** Data abstraction of de Vries *et al.* 1997
- eAppendix 11** Data abstraction of Dhanani *et al.* 2014
- eAppendix 12** Data abstraction of Dhanani *et al.* 2021
- eAppendix 13** Data abstraction of Dick *et al.* 2000
- eAppendix 14** Data abstraction of Genbrugge *et al.* 2017
- eAppendix 15** Data abstraction of Germanoska *et al.* 2018
- eAppendix 16** Data abstraction of Matory *et al.* 2021

**eAppendix 17** Data abstraction of McNeill *et al.* 2005  
**eAppendix 18** Data abstraction of Menke *et al.* 2014  
**eAppendix 19** Data abstraction of Sanchez *et al.* 2020  
**eAppendix 20** Data abstraction of Sarti *et al.* 2006  
**eAppendix 21** Data abstraction of Schonberger *et al.* 2014  
**eAppendix 22** Data abstraction of Schramm *et al.* 2013  
**eAppendix 23** Data abstraction of Schwarz *et al.* 1996  
**eAppendix 24** Data abstraction of Simard *et al.* 2019  
**eAppendix 25** Data abstraction of Slavin *et al.* 1994  
**eAppendix 26** Data abstraction of Tibballs *et al.* 2010  
**eAppendix 27** Data abstraction of Tibballs *et al.* 2009  
**eAppendix 28** Data abstraction of Zengin *et al.* 2018

## eAppendix 1

## Search strategy for MEDLINE

**Database:** Ovid MEDLINE(R) ALL 1946 to April 26, 2021

**Date search conducted:** April 27, 2021

### Strategy:

- 1 exp \*Heart Arrest/ (36249)
- 2 ((arrest\$1 or dead or death\$1 or flat-lin\* or flatlin\*) adj2 (cardi\* or circulat\* or heart)).tw,kf. (95494)
- 3 asystol\*.tw,kf. (4407)
- 4 (cessation adj5 (cardiac rhythm\$1 or circulat\* or heart function\*)).tw,kf. (237)
- 5 ((cessation or terminat\*) adj3 cardi\* resuscitation).tw,kf. (43)
- 6 or/1-5 [Set 1: cardiac arrest or circulatory death] (107656)
- 7 Monitoring, Physiologic/ (56086)
- 8 "Sensitivity and Specificity"/ (353899)
- 9 Vital Signs/ (1516)
- 10 detect\*.tw,kf. (2454927)
- 11 measurement\*.ti. (188631)
- 12 measurement\*.ab. /freq=2 (262819)
- 13 monitor\*.tw,kf. (852063)
- 14 vital sign\$1.tw,kf. (15764)
- 15 or/7-14 [Set 2: vital signs monitoring] (3653026)
- 16 Arterial Pressure/ (6045)
- 17 Blood Pressure/ph [Physiology] (53044)
- 18 Blood Pressure Determination/ (28681)
- 19 ABP\*.tw,kf. (10939)
- 20 ((arter\* or aortic) adj3 (pressure\$1 or tension\$1)).tw,kf. (123551)
- 21 arterial line\$1.tw,kf. (1451)
- 22 or/16-21 [Set 3: arterial line] (197650)
- 23 exp Auscultation/ (9235)
- 24 \*Echocardiography/ (29695)
- 25 exp Echocardiography, Doppler/ (28957)
- 26 \*Electrocardiography/ (67040)
- 27 Oximetry/ (13386)
- 28 Palpation/ (7710)
- 29 Perfusion Index/ (30)
- 30 Pulse/ (17022)
- 31 (absen\* adj2 (breath sound\$1 or breathing or heart sound\$1 or pulse)).tw,kf. (366)
- 32 auscultat\*.tw,kf. (6697)
- 33 (echo-cardiogra\* or echocardiogra\*).ti. (46775)
- 34 (echo-cardiogra\* or echocardiogra\*).ab. /freq=2 (53417)
- 35 (ECG\* or EKG\* or electro-cardiogra\* or electrocardiogra\*).ti. (44596)
- 36 (ECG\* or EKG\* or electro-cardiogra\* or electrocardiogra\*).ab. /freq=2 (47641)
- 37 (oximet\* adj3 pulse).tw,kf. (9142)
- 38 (palpa\* adj3 pulse).tw,kf. (572)
- 39 palpat\*.tw,kf. (15554)
- 40 (perfusion adj2 (measur\* or index)).tw,kf. (4831)

- 41 or/23-40 [Set 4: alternate means of measuring circulation] (269889)
- 42 and/6,15,22 [Sets 1 and 2 and 3] (739)
- 43 and/6,15,41 [Sets 1 and 2 and 4] (2710)
- 44 42 or 43 (3326)
- 45 (exp animals/ or exp animal experimentation/ or exp models animal/ or exp vertebrates/ not (exp humans/ or exp human experimentation/)) (4819180)
- 46 ((ape or apes or animal\* or baboon\* or beagle\* or cat or cats or chicken or chickens or chimp\* or dog or dogs or feline\* or fish or hamster or hamsters or horse or horses or lapin\* or macaque\* or mouse or mice or nonhuman\* or non human\* or pig or piglet\* or pigs or porcine or rabbit or rabbit or raccoon or raccoons or racehorse or racehorses or rat or rats or rodent\* or swine\* or sheep or zebrafish\*) not (adults or children or human or humans or infants or patient or patients or people or seniors)).ti,kf. (2178262)
- 47 45 or 46 (5186992)
- 48 44 not 47 [exclude animal studies] (2980)
- 49 remove duplicates from 48 [MEDLINE results for export] (2977)

## eAppendix 2 Search strategy for Embase

**Database:** Ovid Embase Classic+Embase 1947 to April 26

**Date search conducted:** April 27, 2021

### Strategy:

- 1 exp \*heart arrest/ (40552)
- 2 ((arrest\$1 or dead or death\$1 or flat-lin\* or flatlin\*) adj2 (cardi\* or circulat\* or heart)).tw,kw. (159504)
- 3 asystol\*.tw,kw. (7840)
- 4 (cessation adj5 (cardiac rhythm\$1 or circulat\* or heart function\*)).tw,kw. (375)
- 5 ((cessation or terminat\*) adj3 cardi\* resuscitation).tw,kw. (64)
- 6 or/1-5 [Set 1: cardiac arrest or circulatory death] (170024)
- 7 physiologic monitoring/ (5787)
- 8 "sensitivity and specificity"/ (393851)
- 9 vital sign/ (26094)
- 10 detect\*.tw,kw. (3258606)
- 11 monitor\*.tw,kw. (1204958)
- 12 vital sign\$1.tw,kw. (31899)
- 13 or/7-12 [Set 2: vital signs monitoring] (4472611)
- 14 exp \*arterial pressure/ (13354)
- 15 blood pressure monitoring/ (50751)
- 16 ABP\*.tw,kw. (18788)
- 17 ((arter\* or aortic) adj3 (pressure\$1 or tension\$1)).tw,kw. (183809)
- 18 arterial line\$1.tw,kw. (2796)
- 19 or/14-18 [Set 3: arterial line] (244869)
- 20 exp auscultation/ (19395)
- 21 exp Doppler echocardiography/ (29685)
- 22 \*echocardiography/ (43444)
- 23 \*electrocardiography/ (50717)
- 24 palpation/ (21787)
- 25 perfusion index/ (265)
- 26 pulse oximetry/ (16729)
- 27 \*pulse rate/ (6322)
- 28 (absen\* adj2 (breath sound\$1 or breathing or heart sound\$1 or pulse)).tw,kw. (815)
- 29 auscultat\*.tw,kw. (11523)
- 30 (echo-cardiogra\* or echocardiogra\*).ti. (69029)
- 31 (echo-cardiogra\* or echocardiogra\*).ab. /freq=2 (97131)
- 32 (ECG\* or EKG\* or electro-cardiogra\* or electrocardiogra\*).ti. (57837)
- 33 (ECG\* or EKG\* or electro-cardiogra\* or electrocardiogra\*).ab. /freq=2 (84302)
- 34 (oximet\* adj3 pulse).tw,kw. (13752)
- 35 (palpa\* adj3 pulse).tw,kw. (1051)
- 36 palpat\*.tw,kw. (26892)
- 37 (perfusion adj2 (measur\* or index)).tw,kw. (7017)
- 38 or/20-37 [Set 4: alternate means of measuring circulation] (378053)
- 39 and/6,13,19 [Sets 1 and 2 and 3] (1321)
- 40 and/6,13,38 [Sets 1 and 2 and 4] (4426)

41 39 or 40 (5522)  
42 (exp animals/ or exp animal experiment/ or exp animal experimentation/ or exp models animal/ or nonhuman/ or exp vertebrate/ or exp vertebrates/) not (exp humans/ or exp human experiment/ or exp human experimentation/) (7555078)  
43 ((ape or apes or animal\* or baboon\* or beagle\* or cat or cats or chicken or chickens or chimp\* or dog or dogs or feline\* or fish or hamster or hamsters or horse or horses or lapin\* or macaque\* or mouse or mice or nonhuman\* or non human\* or pig or piglet\* or pigs or porcine or rabbit or rabbit or raccoon or raccoons or racehorse or racehorses or rat or rats or rodent\* or swine\* or sheep or zebrafish\*) not (adults or children or human or humans or infants or patient or patients or people or seniors)).ti. (2590176)  
44 42 or 43 (7833758)  
45 41 not 44 [exclude animal studies] (4993)  
46 (Conference Abstract or Conference Paper or Conference Review).pt. (4874389)  
47 45 and 46 (2242)  
48 limit 47 to yr="2018-2021" (689)  
49 45 not 46 [exclude conference proceedings] (2751)  
50 48 or 49 [add proceedings from last 3 yrs] (3440)  
51 remove duplicates from 50 [Embase results for export] (3357)

### eAppendix 3 Search strategy for Cochrane Central Register of Controlled Trials

**Database:** EBM Reviews - Cochrane Central Register of Controlled Trials March 2021

**Date search conducted:** April 27, 2021

#### Strategy:

- 1 exp Heart Arrest/ (1998)
- 2 ((arrest\$1 or dead or death\$1 or flat-lin\* or flatlin\*) adj2 (cardi\* or circulat\* or heart)).tw. (14791)
- 3 asystol\*.tw. (312)
- 4 (cessation adj5 (cardiac rhythm\$1 or circulat\* or heart function\*)).tw. (16)
- 5 ((cessation or terminat\*) adj3 cardi\* resuscitation).tw. (0)
- 6 or/1-5 [Set 1: cardiac arrest or circulatory death] (15477)
- 7 Monitoring, Physiologic/ (2256)
- 8 "Sensitivity and Specificity"/ (9350)
- 9 Vital Signs/ (98)
- 10 detect\*.tw. (93291)
- 11 measurement\*.tw. (130467)
- 12 monitor\*.tw. (91508)
- 13 vital sign\$1.tw. (15003)
- 14 or/7-13 [Set 2: vital signs monitoring] (299199)
- 15 Arterial Pressure/ (443)
- 16 Blood Pressure/ph [Physiology] (0)
- 17 Blood Pressure Determination/ (1123)
- 18 ABP\*.tw. (2112)
- 19 ((arter\* or aortic) adj3 (pressure\$1 or tension\$1)).tw. (20487)
- 20 arterial line\$1.tw. (495)
- 21 or/15-20 [Set 3: arterial line] (23778)
- 22 exp Auscultation/ (174)
- 23 Echocardiography/ (2771)
- 24 exp Echocardiography, Doppler/ (1127)
- 25 Electrocardiography/ (7746)
- 26 Oximetry/ (824)
- 27 Palpation/ (354)
- 28 Perfusion Index/ (1)
- 29 Pulse/ (1425)
- 30 (absen\* adj2 (breath sound\$1 or breathing or heart sound\$1 or pulse)).tw. (72)
- 31 auscultat\*.tw. (858)
- 32 (echo-cardiogra\* or echocardiogra\*).ti. (2253)
- 33 (echo-cardiogra\* or echocardiogra\*).ab. /freq=2 (4442)
- 34 (ECG\* or EKG\* or electro-cardiogra\* or electrocardiogra\*).ti. (1957)
- 35 (ECG\* or EKG\* or electro-cardiogra\* or electrocardiogra\*).ab. /freq=2 (8134)
- 36 (oximet\* adj3 pulse).tw. (3449)
- 37 (palpa\* adj3 pulse).tw. (112)
- 38 palpat\*.tw. (2343)
- 39 (perfusion adj2 (measur\* or index)).tw. (789)
- 40 or/22-39 [Set 4: alternate means of measuring circulation] (30672)

- 41 and/6,14,21 [Sets 1 and 2 and 3] (152)
- 42 and/6,14,40 [Sets 1 and 2 and 4] (436)
- 43 41 or 42 (550)
- 44 remove duplicates from 43 [CENTRAL results for export] (545)



#### eAppendix 4 Search strategy for Web of Science Core Collection

**Database:** Web of Science Core Collection: Science Citation Index Expanded (SCI-EXPANDED) --1900-present

**Date search conducted:** April 27, 2021

**Strategy:**

1 TS=((arrest\* or dead or death\* or "flat lin\*" or flatlin\*) NEAR/2 (cardi\* or circulat\* or heart) ) or asystol\* or (cessation NEAR/5 ("cardiac rhythm\*" or circulat\* or "heart function\*")) or ((cessation or terminat\*) NEAR/3 "cardi\* resuscitation"))

*Indexes=SCI-EXPANDED Timespan=All years*

2 TS=(detect\* or monitor\* or "vital sign\*") or TI=measurement\*

*Indexes=SCI-EXPANDED Timespan=All years*

3 TS=((arter\* or aortic) NEAR/3 (pressur\* or tension\*) ) or "arterial line\*")

*Indexes=SCI-EXPANDED Timespan=All years*

4 TS=((absen\* NEAR/2 ("breath sound\*" or breathing or "heart sound\*" or pulse) ) or auscultat\* or (oximet\* NEAR/3 pulse) or (palpa\* NEAR/3

pulse) or palpat\* or (perfusion NEAR/2 (measur\* or

index) ) or TI=("echo cardiogra\*" or echocardiogra\* or ECG\* or EKG\* or "electro cardiogra\*" or electrocard ogra\*) *Indexes=SCI-EXPANDED Timespan=All years*

5 #3 AND #2 AND #1

*Indexes=SCI-EXPANDED Timespan=All years*

6 #4 AND #2 AND #1

*Indexes=SCI-EXPANDED Timespan=All years*

7 #6 OR #5

*Indexes=SCI-EXPANDED Timespan=All years*

8 TI=((ape or apes or animal\* or baboon\* or beagle\* or cat or cats or chicken or chickens or chimp\* or dog or dogs or feline\* or fish or hamster or hamsters or horse or horses or lapin\* or mouse or mice or nonhuman\* or "non human\*" or pig or piglet\* or pigs or porcine or rabbit or rabbit or raccoon or raccoons or racehorse or racehorses or rat or rats or rodent\* or swine\* or sheep) not (adults or children or human or humans or infants or patient or patients or people or seniors) )

*Indexes=SCI-EXPANDED Timespan=All years*

9 #7 NOT #8

*Indexes=SCI-EXPANDED Timespan=All years*

## eAppendix 5 PRISMA 2020 Main Checklist

| Topic                       | No. | Item                                                                                                                                                                                                                                                                             | Location where item is reported         |
|-----------------------------|-----|----------------------------------------------------------------------------------------------------------------------------------------------------------------------------------------------------------------------------------------------------------------------------------|-----------------------------------------|
| <b>TITLE</b>                |     |                                                                                                                                                                                                                                                                                  |                                         |
| <b>Title</b>                | 1   | Identify the report as a systematic review.                                                                                                                                                                                                                                      | Page 1, Title                           |
| <b>ABSTRACT</b>             |     |                                                                                                                                                                                                                                                                                  |                                         |
| <b>Abstract</b>             | 2   | See the PRISMA 2020 for Abstracts checklist                                                                                                                                                                                                                                      |                                         |
| <b>INTRODUCTION</b>         |     |                                                                                                                                                                                                                                                                                  |                                         |
| <b>Rationale</b>            | 3   | Describe the rationale for the review in the context of existing knowledge.                                                                                                                                                                                                      | Page 4, Introduction Paragraph 2        |
| <b>Objectives</b>           | 4   | Provide an explicit statement of the objective(s) or question(s) the review addresses.                                                                                                                                                                                           | Page 4, Introduction Paragraph 2        |
| <b>METHODS</b>              |     |                                                                                                                                                                                                                                                                                  |                                         |
| <b>Eligibility criteria</b> | 5   | Specify the inclusion and exclusion criteria for the review and how studies were grouped for the syntheses.                                                                                                                                                                      | Page 4-5, Methods, Eligibility criteria |
| <b>Information sources</b>  | 6   | Specify all databases, registers, websites, organisations, reference lists and other sources searched or consulted to identify studies. Specify the date when each source was last searched or consulted.                                                                        | Page 5, Methods, Information sources    |
| <b>Search strategy</b>      | 7   | Present the full search strategies for all databases, registers and websites, including any filters and limits used.                                                                                                                                                             | Appendices 1-4                          |
| <b>Selection process</b>    | 8   | Specify the methods used to decide whether a study met the inclusion criteria of the review, including how many reviewers screened each record and each report retrieved, whether they worked independently, and if applicable, details of automation tools used in the process. | Page 5, Methods, Selection process      |

| Topic                                | No. | Item                                                                                                                                                                                                                                                                                                 | Location where item is reported            |
|--------------------------------------|-----|------------------------------------------------------------------------------------------------------------------------------------------------------------------------------------------------------------------------------------------------------------------------------------------------------|--------------------------------------------|
| <b>Data collection process</b>       | 9   | Specify the methods used to collect data from reports, including how many reviewers collected data from each report, whether they worked independently, any processes for obtaining or confirming data from study investigators, and if applicable, details of automation tools used in the process. | Page 5, Methods, Data collection and items |
| <b>Data items</b>                    | 10a | List and define all outcomes for which data were sought. Specify whether all results that were compatible with each outcome domain in each study were sought (e.g. for all measures, time points, analyses), and if not, the methods used to decide which results to collect.                        | Page 5, Methods, Data collection and items |
|                                      | 10b | List and define all other variables for which data were sought (e.g. participant and intervention characteristics, funding sources). Describe any assumptions made about any missing or unclear information.                                                                                         | Page 5, Methods, Data collection and items |
| <b>Study risk of bias assessment</b> | 11  | Specify the methods used to assess risk of bias in the included studies, including details of the tool(s) used, how many reviewers assessed each study and whether they worked independently, and if applicable, details of automation tools used in the process.                                    | Page 5, Methods, Risk of bias assessment   |
| <b>Effect measures</b>               | 12  | Specify for each outcome the effect measure(s) (e.g. risk ratio, mean difference) used in the synthesis or presentation of results.                                                                                                                                                                  | Page 5, Methods, Data collection and items |
| <b>Synthesis methods</b>             | 13a | Describe the processes used to decide which studies were eligible for each synthesis (e.g. tabulating the study intervention characteristics and comparing against the planned groups for each synthesis (item 5)).                                                                                  | Page 5, Methods, Synthesis methods         |

| Topic                            | No. Item                                                                                                                                                                                                                                                        | Location where item is reported                                     |
|----------------------------------|-----------------------------------------------------------------------------------------------------------------------------------------------------------------------------------------------------------------------------------------------------------------|---------------------------------------------------------------------|
|                                  | 13b Describe any methods required to prepare the data for presentation or synthesis, such as handling of missing summary statistics, or data conversions.                                                                                                       | Page 5, Methods, Synthesis methods                                  |
|                                  | 13c Describe any methods used to tabulate or visually display results of individual studies and syntheses.                                                                                                                                                      | Page 5, Methods, Synthesis methods                                  |
|                                  | 13d Describe any methods used to synthesize results and provide a rationale for the choice(s). If meta-analysis was performed, describe the model(s), method(s) to identify the presence and extent of statistical heterogeneity, and software package(s) used. | Page 5, Methods, Synthesis methods                                  |
|                                  | 13e Describe any methods used to explore possible causes of heterogeneity among study results (e.g. subgroup analysis, meta-regression).                                                                                                                        | Page 5, Methods, Synthesis methods                                  |
|                                  | 13f Describe any sensitivity analyses conducted to assess robustness of the synthesized results.                                                                                                                                                                | NA                                                                  |
| <b>Reporting bias assessment</b> | 14 Describe any methods used to assess risk of bias due to missing results in a synthesis (arising from reporting biases).                                                                                                                                      | Page 6, Methods, Certainty assessment and reporting bias assessment |
| <b>Certainty assessment</b>      | 15 Describe any methods used to assess certainty (or confidence) in the body of evidence for an outcome.                                                                                                                                                        | Page 6, Methods, Certainty assessment and reporting bias assessment |
| <b>RESULTS</b>                   |                                                                                                                                                                                                                                                                 |                                                                     |
| <b>Study selection</b>           | 16a Describe the results of the search and selection process, from the number of records identified in the search to the number of studies included in the review, ideally using a flow diagram.                                                                | Page 6, Results, Study selection and characteristics                |

| Topic                                | No. | Item                                                                                                                                                                                                                                                                                 | Location where item is reported |
|--------------------------------------|-----|--------------------------------------------------------------------------------------------------------------------------------------------------------------------------------------------------------------------------------------------------------------------------------------|---------------------------------|
|                                      | 16b | Cite studies that might appear to meet the inclusion criteria, but which were excluded, and explain why they were excluded.                                                                                                                                                          | NA                              |
| <b>Study characteristics</b>         | 17  | Cite each included study and present its characteristics.                                                                                                                                                                                                                            | Table 1                         |
| <b>Risk of bias in studies</b>       | 18  | Present assessments of risk of bias for each included study.                                                                                                                                                                                                                         | Table 2                         |
| <b>Results of individual studies</b> | 19  | For all outcomes, present, for each study: (a) summary statistics for each group (where appropriate) and (b) an effect estimate and its precision (e.g. confidence/credible interval), ideally using structured tables or plots.                                                     | Table 3a, 3b                    |
| <b>Results of syntheses</b>          | 20a | For each synthesis, briefly summarise the characteristics and risk of bias among contributing studies.                                                                                                                                                                               | Table 3a, 3b                    |
|                                      | 20b | Present results of all statistical syntheses conducted. If meta-analysis was done, present for each the summary estimate and its precision (e.g. confidence/credible interval) and measures of statistical heterogeneity. If comparing groups, describe the direction of the effect. | NA                              |
|                                      | 20c | Present results of all investigations of possible causes of heterogeneity among study results.                                                                                                                                                                                       | NA                              |
|                                      | 20d | Present results of all sensitivity analyses conducted to assess the robustness of the synthesized results.                                                                                                                                                                           | NA                              |
| <b>Reporting biases</b>              | 21  | Present assessments of risk of bias due to missing results (arising from reporting biases) for each synthesis assessed.                                                                                                                                                              | Table 3a, 3b                    |
| <b>Certainty of evidence</b>         | 22  | Present assessments of certainty (or confidence) in the body of evidence for each outcome assessed.                                                                                                                                                                                  | Table 3a, 3b                    |

| Topic                            | No. | Item                                                                                                                                           | Location where item is reported          |
|----------------------------------|-----|------------------------------------------------------------------------------------------------------------------------------------------------|------------------------------------------|
| <b>DISCUSSION</b>                |     |                                                                                                                                                |                                          |
| <b>Discussion</b>                | 23a | Provide a general interpretation of the results in the context of other evidence.                                                              | Page 9, Discussion, Paragraph 1          |
|                                  | 23b | Discuss any limitations of the evidence included in the review.                                                                                | Page 10, Discussion, Paragraph 7         |
|                                  | 23c | Discuss any limitations of the review processes used.                                                                                          | Page 10, Discussion, Paragraph 7         |
|                                  | 23d | Discuss implications of the results for practice, policy, and future research.                                                                 | Page 10, Discussion, Paragraph 7         |
| <b>OTHER INFORMATION</b>         |     |                                                                                                                                                |                                          |
| <b>Registration and protocol</b> | 24a | Provide registration information for the review, including register name and registration number, or state that the review was not registered. | Page 4, Methods, Paragraph 1             |
|                                  | 24b | Indicate where the review protocol can be accessed, or state that a protocol was not prepared.                                                 | Page 4, Methods, Paragraph 1             |
|                                  | 24c | Describe and explain any amendments to information provided at registration or in the protocol.                                                | Page 4, Methods, Risk of bias assessment |
| <b>Support</b>                   | 25  | Describe sources of financial or non-financial support for the review, and the role of the funders or sponsors in the review.                  | Page 1, Funding                          |
| <b>Competing interests</b>       | 26  | Declare any competing interests of review authors.                                                                                             | Page 1, Competing interests              |

| Topic                                                 | No. | Item                                                                                                                                                                                                                                       | Location where item is reported |
|-------------------------------------------------------|-----|--------------------------------------------------------------------------------------------------------------------------------------------------------------------------------------------------------------------------------------------|---------------------------------|
| <b>Availability of data, code and other materials</b> | 27  | Report which of the following are publicly available and where they can be found: template data collection forms; data extracted from included studies; data used for all analyses; analytic code; any other materials used in the review. | Page 4-5, Methods               |

## eAppendix 6 PRISMA 2020 Abstract Checklist

| Topic                          | No. | Item                                                                                                                                                                                                                                                                                                  | Reported? |
|--------------------------------|-----|-------------------------------------------------------------------------------------------------------------------------------------------------------------------------------------------------------------------------------------------------------------------------------------------------------|-----------|
| <b>TITLE</b>                   |     |                                                                                                                                                                                                                                                                                                       |           |
| <b>Title</b>                   | 1   | Identify the report as a systematic review.                                                                                                                                                                                                                                                           | Yes       |
| <b>BACKGROUND</b>              |     |                                                                                                                                                                                                                                                                                                       |           |
| <b>Objectives</b>              | 2   | Provide an explicit statement of the main objective(s) or question(s) the review addresses.                                                                                                                                                                                                           | Yes       |
| <b>METHODS</b>                 |     |                                                                                                                                                                                                                                                                                                       |           |
| <b>Eligibility criteria</b>    | 3   | Specify the inclusion and exclusion criteria for the review.                                                                                                                                                                                                                                          | Yes       |
| <b>Information sources</b>     | 4   | Specify the information sources (e.g. databases, registers) used to identify studies and the date when each was last searched.                                                                                                                                                                        | Yes       |
| <b>Risk of bias</b>            | 5   | Specify the methods used to assess risk of bias in the included studies.                                                                                                                                                                                                                              | Yes       |
| <b>Synthesis of results</b>    | 6   | Specify the methods used to present and synthesize results.                                                                                                                                                                                                                                           | Yes       |
| <b>RESULTS</b>                 |     |                                                                                                                                                                                                                                                                                                       |           |
| <b>Included studies</b>        | 7   | Give the total number of included studies and participants and summarise relevant characteristics of studies.                                                                                                                                                                                         | Yes       |
| <b>Synthesis of results</b>    | 8   | Present results for main outcomes, preferably indicating the number of included studies and participants for each. If meta-analysis was done, report the summary estimate and confidence/credible interval. If comparing groups, indicate the direction of the effect (i.e. which group is favoured). | Yes       |
| <b>DISCUSSION</b>              |     |                                                                                                                                                                                                                                                                                                       |           |
| <b>Limitations of evidence</b> | 9   | Provide a brief summary of the limitations of the evidence included in the review (e.g. study risk of bias, inconsistency and imprecision).                                                                                                                                                           | Yes       |
| <b>Interpretation</b>          | 10  | Provide a general interpretation of the results and important implications.                                                                                                                                                                                                                           | Yes       |



| Topic               | No. | Item                                                  | Reported? |
|---------------------|-----|-------------------------------------------------------|-----------|
| <b>OTHER</b>        |     |                                                       |           |
| <b>Funding</b>      | 11  | Specify the primary source of funding for the review. | Yes       |
| <b>Registration</b> | 12  | Provide the register name and registration number.    | Yes       |

## eAppendix 7 Bibliography

1. Blaivas M. Discordance Between Pulse Detection and Emergent Echocardiography Findings in Adult Cardiopulmonary Arrest Patients. *Annals of Emergency Medicine*. 2008;52(4):S128-S.
2. Caccioppola A, Carbonara M, Macrì M, Longhi L, Magnoni S, Ortolano F, et al. Ultrasound-tagged near-infrared spectroscopy does not disclose absent cerebral circulation in brain-dead adults. *Br J Anaesth*. 2018;121(3):588-94.
3. de Vries JW, Visser GH, Bakker PF. Neuromonitoring in defibrillation threshold testing. A comparison between EEG, near-infrared spectroscopy and jugular bulb oximetry. *Journal of Clinical Monitoring*. 1997;13(5):303-7.
4. Dhanani S, Hornby L, van Beinum A, Scales NB, Hogue M, Baker A, et al. Resumption of Cardiac Activity after Withdrawal of Life-Sustaining Measures. *New England Journal of Medicine*. 2021;384(4):345-52.
5. Dhanani S, Hornby L, Ward R, Baker A, Dodek P, Chamber-Evans J, et al. Vital signs after cardiac arrest following withdrawal of life-sustaining therapy: a multicenter prospective observational study. *Critical Care Medicine*. 2014;42(11):2358-69.
6. Dick WF, Eberle B, Wisser G, Schneider T. The carotid pulse check revisited: what if there is no pulse? *Crit Care Med*. 2000;28(11 Suppl):N183-5.
7. Genbrugge C, Eertmans W, Jans F, Boer W, Dens J, De Deyne C. Regional cerebral saturation monitoring during withdrawal of life support until death. *Resuscitation*. 2017;121:147-50.
8. Germanoska B, Coady M, Ng S, Fermanis G, Miller M. The reliability of carotid ultrasound in determining the return of pulsatile flow: A pilot study. *Ultrasound*. 2018;26(2):118-26.
9. Matory AL, Alkhachroum A, Chiu WT, Eliseyev A, Doyle K, Rohaut B, et al. Electrocerebral Signature of Cardiac Death. *Neurocrit Care*. 2021;35(3):853-61.
10. McNeill E, Gagnon RE, Potts JE, Yeung-Lai-Wah JA, Kerr CR, Sanatani S. Cerebral oxygenation during defibrillator threshold testing of implantable cardioverter defibrillators. *PACE-Pacing Clin Electrophysiol*. 2005;28(6):528-33.
11. Menke J, Moller G. Cerebral near-infrared spectroscopy correlates to vital parameters during cardiopulmonary bypass surgery in children. *Pediatric Cardiology*. 2014;35(1):155-63.
12. Sanchez S, Miller M, Asha S. Assessing the validity of two-dimensional carotid ultrasound to detect the presence and absence of a pulse. *Resuscitation*. 2020;157:67-73.
13. Sarti A, Savron F, Ronfani L, Pelizzo G, Barbi E. Comparison of three sites to check the pulse and count heart rate in hypotensive infants. *Paediatric Anaesthesia*. 2006;16(4):394-8.
14. Schonberger RB, Lampert RJ, Mandel EI, Feinleib J, Gong Z, Honiden S. Handheld Doppler to improve pulse checks during resuscitation of putative pulseless electrical activity arrest. *Anesthesiology*. 2014;120(4):1042-5.
15. Schramm C, Huber A, Plaschke K. The accuracy and responsiveness of continuous noninvasive arterial pressure during rapid ventricular pacing for transcatheter aortic valve replacement. *Anesth Analg*. 2013;117(1):76-82.

16. Schwarz G, Litscher G, Kleinert R, Jobstmann R. Cerebral oximetry in dead subjects. *Journal of Neurosurgical Anesthesiology*. 1996;8(3):189-93.
17. Simard RD, Unger AG, Betz M, Wu A, Chenkin J. The POCUS Pulse Check: A Case Series on a Novel Method for Determining the Presence of a Pulse Using Point-of-Care Ultrasound. *Journal of Emergency Medicine*. 2019;56(6):674-9.
18. Slavin KV, Dujovny M, Ausman JI, Hernandez G, Luer M, Stoddart H. Clinical experience with transcranial cerebral oximetry. *Surg Neurol*. 1994;42(6):531-9; discussion 40.
19. Tibballs J, Weeraratna C. The influence of time on the accuracy of healthcare personnel to diagnose paediatric cardiac arrest by pulse palpation. *Resuscitation*. 2010;81(6):671-5.
20. Tibballs J, Russell P. Reliability of pulse palpation by healthcare personnel to diagnose paediatric cardiac arrest. *Resuscitation*. 2009;80(1):61-4.
21. Zengin S, Gumusboga H, Sabak M, Eren SH, Altunbas G, Al B. Comparison of manual pulse palpation, cardiac ultrasonography and Doppler ultrasonography to check the pulse in cardiopulmonary arrest patients. *Resuscitation*. 2018;133:59-64.

**eAppendix 8** Data abstraction of Blaiivas 2008

|                                 |                                                                                                                                                                                                                                                                                                                                                                                                                                                                                                                                                                                                                                                                                                                                                                                                                                                                              |
|---------------------------------|------------------------------------------------------------------------------------------------------------------------------------------------------------------------------------------------------------------------------------------------------------------------------------------------------------------------------------------------------------------------------------------------------------------------------------------------------------------------------------------------------------------------------------------------------------------------------------------------------------------------------------------------------------------------------------------------------------------------------------------------------------------------------------------------------------------------------------------------------------------------------|
| Domain                          |                                                                                                                                                                                                                                                                                                                                                                                                                                                                                                                                                                                                                                                                                                                                                                                                                                                                              |
| Methods                         | <p><u>Country:</u> USA</p> <p><u>Study aim:</u> To define the frequency of focused bedside echocardiography (Echo) during cardiopulmonary resuscitation (CPR) corresponds to pulse checks in patients undergoing CPR.</p> <p><u>Design:</u> Prospective observational</p> <p><u>Blinded:</u> No</p>                                                                                                                                                                                                                                                                                                                                                                                                                                                                                                                                                                          |
| Population                      | <p><u>Study population:</u> Patient in cardiopulmonary arrest in ER</p> <p><u>Includes pediatrics:</u> No</p> <p><u>Includes MAiD:</u> No</p> <p><u>Includes DCD:</u> No</p> <p><u>N (patients):</u> 226</p> <p><u>Age, mean/median (SD/Range):</u> NR</p>                                                                                                                                                                                                                                                                                                                                                                                                                                                                                                                                                                                                                   |
| Reference test                  | <p><u>Test type:</u> Palpable pulse</p> <p><u>Test details:</u> Nurses and physicians attempted to locate pulses while one emergency physician performed a brief Echo of the heart with a compact ultrasound machine.</p> <p><u>Definition of +/- circulation:</u> NR</p>                                                                                                                                                                                                                                                                                                                                                                                                                                                                                                                                                                                                    |
| Comparator test(s) description  | <p><u>Comparator test 1:</u> Cardiac Echo</p> <p><u>Test details:</u> Brief Echo of the heart with a compact US machine. Echo checks were limited to the time available during pulse checks and ended when the treating emergency physician ordered resumption of chest compressions.</p> <p><u>Definition of +/- circulation:</u> NR</p> <p><u>Comparator test 2:</u> Doppler US on carotid artery</p> <p><u>Test details:</u> If Echo suggested sufficient EF to generate blood flow but pulse check was negative, the carotid arteries were evaluated with Doppler when interference with resuscitative efforts could be avoided.</p> <p><u>Definition of +/- circulation:</u> NR</p>                                                                                                                                                                                     |
| Outcomes for comparator test(s) | <p><b>Cardiac Echo</b></p> <p><u>Sensitivity:</u> NR</p> <p><u>Specificity:</u> NR</p> <p><u>Definition of sensitivity:</u> NR</p> <p><u>Definition of specificity:</u> NR</p> <p><u>Reported false negative:</u> NR</p> <p><u>Reported false positive:</u> 11%</p> <p><u>Definition of false negative:</u> NR</p> <p><u>Definition of false positive:</u> When Echo shows myocardial standstill or negligible EF, but pulse detected by palpation.</p> <p><u>Additional details:</u> Total of 248 Echo checks revealed EF of severely depressed or better and were felt to likely generate a detectable blood pressure. In 47% of these Echo checks, no pulses were palpable. In 11% of cases when electrical cardiac activity was noted on the monitor and a health care provider noted palpable pulses, the echo showed either myocardial standstill or negligible EF</p> |

|                        |                                                                                                                                                                                                                                                                                                                                                                                                                                                                                                                                                                                                                                                                                                                                        |
|------------------------|----------------------------------------------------------------------------------------------------------------------------------------------------------------------------------------------------------------------------------------------------------------------------------------------------------------------------------------------------------------------------------------------------------------------------------------------------------------------------------------------------------------------------------------------------------------------------------------------------------------------------------------------------------------------------------------------------------------------------------------|
|                        | <p><b>Doppler US on carotid</b></p> <p><u>Sensitivity:</u> NR</p> <p><u>Specificity:</u> NR</p> <p><u>Definition of sensitivity:</u> NR</p> <p><u>Definition of specificity:</u> NR</p> <p><u>Reported false negative:</u> 37%</p> <p><u>Reported false positive:</u> NR</p> <p><u>Definition of false negative:</u> If palpable pulse is seen as index test, then false negative would be when Doppler shows flow, but palpable pulse shows no flow.</p> <p><u>Definition of false positive:</u> NR</p> <p><u>Additional details:</u> In 37% of cases when Echo showed severely depressed or better EF but no pulses were palpable. In these cases, all patients showed flow in the carotid on both color and pulse wave Doppler.</p> |
| Thresholds             | <p><u>Outcome(s) on threshold for index test:</u> NR</p> <p><u>Suggested threshold for index test:</u> NR</p>                                                                                                                                                                                                                                                                                                                                                                                                                                                                                                                                                                                                                          |
| Other relevant results | <p>No comparison to arterial line, so it was difficult to decide which is one was the index test. If palpable pulse is the index test, then FP (saying circulation ceased when it hasn't) is when palpable pulse is absent and comparator test says circulation is present; but we know palpable pulse is unreliable to detect arrest of circulation.</p>                                                                                                                                                                                                                                                                                                                                                                              |

**eAppendix 9** Data abstraction of Caccioppola *et al.* 2018

|                                 |                                                                                                                                                                                                                                                                                                                                                                                                                                                                                                                                                                                                                                                                                                                                                                                                                                                                                                       |
|---------------------------------|-------------------------------------------------------------------------------------------------------------------------------------------------------------------------------------------------------------------------------------------------------------------------------------------------------------------------------------------------------------------------------------------------------------------------------------------------------------------------------------------------------------------------------------------------------------------------------------------------------------------------------------------------------------------------------------------------------------------------------------------------------------------------------------------------------------------------------------------------------------------------------------------------------|
| Domain                          |                                                                                                                                                                                                                                                                                                                                                                                                                                                                                                                                                                                                                                                                                                                                                                                                                                                                                                       |
| Methods                         | <p><u>Country:</u> Italy</p> <p><u>Study aim:</u> To examine whether UT-NIRS properly detects the absence of cerebral blood flow (CBF) in brain-dead patients in comparison to healthy volunteers.</p> <p><u>Design:</u> Case-control</p> <p><u>Blinded:</u> No</p>                                                                                                                                                                                                                                                                                                                                                                                                                                                                                                                                                                                                                                   |
| Population                      | <p><u>Study population:</u> Healthy volunteers and brain-dead patients</p> <p><u>Includes pediatrics:</u> No</p> <p><u>Includes MAiD:</u> No</p> <p><u>Includes DCD:</u> No</p> <p><u>N (patients):</u> 20 healthy volunteers and 20 brain dead patients</p> <p><u>Age, mean/median (SD/Range):</u></p> <p>Healthy volunteers: Median age 26 (25-34) years</p> <p>Brain dead: Median 60 (54-76) years</p>                                                                                                                                                                                                                                                                                                                                                                                                                                                                                             |
| Reference test                  | <p><u>Test type:</u> Clinical exam for brain death and TCCD and/or Angio-CT and/or angiography</p> <p><u>Test details:</u> NR</p> <p><u>Definition of +/- circulation:</u> Irreversible cessation of all brain function as clinically diagnosed and regulated by law in Italy.</p>                                                                                                                                                                                                                                                                                                                                                                                                                                                                                                                                                                                                                    |
| Comparator test(s) description  | <p><u>Comparator test 1:</u> UT-NIRS</p> <p><u>Test details:</u> CerOx™ device (Ornim Medical, Kfar Saba, Israel) up until December 2015, when a new model (c-FLOW™; OrnimMedical) became available. In February 2016, the c-FLOW software was upgraded to a later version. Non-invasive and continuous check of deep tissue blood flow used to measure relative changes in blood flow that monitors regional microcirculatory blood flow in tissues. The device, connected to two probes, displays cerebral flow index (CFI) as a ‘pure’ number that ranges from 0 to 100. The normal CFI range is not known, and the manufacturer suggests considering relative changes in blood flow rather than absolute numbers.</p> <p><u>Definition of +/- circulation:</u> NR</p>                                                                                                                             |
| Outcomes for comparator test(s) | <p><b>NIRS rSO<sub>2</sub></b></p> <p><u>Sensitivity:</u> NR</p> <p><u>Specificity:</u> NR</p> <p><u>Definition of sensitivity:</u> NR</p> <p><u>Definition of specificity:</u> NR</p> <p><u>Reported false negative:</u> NR</p> <p><u>Reported false positive:</u> Reported that NIRS indicated an apparently perfused brain in all pts</p> <p><u>Definition of false negative:</u> Not stated by authors, but FN would be when NIRS shows there is flow in brain dead patients.</p> <p><u>Definition of false positive:</u> NR</p> <p><u>Additional details:</u> Indirect evidence from a population that is not population of interest for this SR.</p> <p>Healthy volunteers had median CFI of 33 (27-36).</p> <p>Brain dead patients had positive CFI, with a median of 41 (36-47) (significantly higher than healthy volunteers), with no significant differences between the two probes in</p> |

|                        |                                                                                                                                                                                                                                                                                                                   |
|------------------------|-------------------------------------------------------------------------------------------------------------------------------------------------------------------------------------------------------------------------------------------------------------------------------------------------------------------|
|                        | patients with intact skull (Wilcoxon test; P=0.85). All recordings had an adequate signal quality. No significant differences were detected between measurements taken with the CerOx or the c-FLOW device. In 11 brain dead patients with no-flow confirmed on imaging, flow was detected by CFI in all of them. |
| Thresholds             | <u>Outcome(s) on threshold for index test: NR</u><br><u>Suggested threshold for index test: NR</u>                                                                                                                                                                                                                |
| Other relevant results | Populations are healthy controls and brain-dead patients and therefore were not our population of interest. However, findings have relevance.                                                                                                                                                                     |

|                                 |                                                                                                                                                                                                                                                                                                                                                                                                                                                                                                                                                                                                                                                                                                                                                                                          |
|---------------------------------|------------------------------------------------------------------------------------------------------------------------------------------------------------------------------------------------------------------------------------------------------------------------------------------------------------------------------------------------------------------------------------------------------------------------------------------------------------------------------------------------------------------------------------------------------------------------------------------------------------------------------------------------------------------------------------------------------------------------------------------------------------------------------------------|
| Domain                          |                                                                                                                                                                                                                                                                                                                                                                                                                                                                                                                                                                                                                                                                                                                                                                                          |
| Methods                         | <p><u>Country:</u> Netherlands</p> <p><u>Study aim:</u> To study the physiological effects of induced ventricular defibrillation and subsequent circulatory arrest for defibrillation threshold testing on the brain using the EEG, jugular bulb oximetry and near-infrared spectroscopy.</p> <p><u>Design:</u> Prospective observational</p> <p><u>Blinded:</u> No</p>                                                                                                                                                                                                                                                                                                                                                                                                                  |
| Population                      | <p><u>Study population:</u> Patients undergoing implantation or revision of an automatic implantable cardioverter-defibrillator (AICD).</p> <p><u>Includes pediatrics:</u> Yes</p> <p><u>Includes MAiD:</u> No</p> <p><u>Includes DCD:</u> No</p> <p><u>N (patients):</u> 13 (59 episodes of circulatory arrest in these patients were studied).</p> <p><u>Age, mean/median (SD/Range):</u> Calculated mean 49.8 years, reported range of 14-73 years old.</p>                                                                                                                                                                                                                                                                                                                           |
| Reference test                  | <p><u>Test type:</u> Induced VF</p> <p><u>Test details:</u> IAP in place but not defined based on IAP</p> <p><u>Definition of +/- circulation:</u> VF = no circulation</p>                                                                                                                                                                                                                                                                                                                                                                                                                                                                                                                                                                                                               |
| Comparator test(s) description  | <p><u>Comparator test 1:</u> NIRS rSO<sub>2</sub></p> <p><u>Test details:</u> The disposable sensor containing a light emitter and 2 receivers, was placed on the right side of the forehead, and secured with adhesive tape. Continuous monitoring. rSO<sub>2</sub> measurement, or NIRS, is based on the back-scatter of transcranially transmitted 2-wavelength incoherent light. NIRS based on pulse, or phase modulated laser is known to be superior to techniques based on the use of incoherent light but is also more complex. NIRS measures the oxygen saturation of a mixture of mainly venous and to a lesser extent capillary and arterial blood in a small sample of cortical tissue.</p> <p><u>Definition of +/- circulation:</u> NR</p>                                  |
| Outcomes for comparator test(s) | <p><b>NIRS</b></p> <p><u>Sensitivity:</u> NR</p> <p><u>Specificity:</u> NR</p> <p><u>Definition of sensitivity:</u> NR</p> <p><u>Definition of specificity:</u> NR</p> <p><u>Reported false negative:</u> NR</p> <p><u>Reported false positive:</u> NR</p> <p><u>Definition of false negative:</u> NR</p> <p><u>Definition of false positive:</u> NR</p> <p><u>Additional details:</u> In all 59 episodes of circulatory arrest that were studied rSO<sub>2</sub> fell instantly and EEG became isoelectric within 12+/- 4 seconds after induction. On successful defibrillation the rSO<sub>2</sub> increased to values in excess of pre-arrest levels and restored towards baseline. After induction of VF, the BP dropped to negligible values and the rSO<sub>2</sub> decreased.</p> |
| Thresholds                      | <p><u>Outcome(s) on threshold for index test:</u> NR</p> <p><u>Suggested threshold for index test:</u> NR</p>                                                                                                                                                                                                                                                                                                                                                                                                                                                                                                                                                                                                                                                                            |
| Other relevant                  | Population is not the population of interest and study is on cerebral circulation using EEG                                                                                                                                                                                                                                                                                                                                                                                                                                                                                                                                                                                                                                                                                              |



|         |                                                                                                                                                                                                                                                                                                                                                          |
|---------|----------------------------------------------------------------------------------------------------------------------------------------------------------------------------------------------------------------------------------------------------------------------------------------------------------------------------------------------------------|
| results | as "gold standard" reference test but results have relevance since setting is one of arrest of circulation. Authors concluded that measurement of rSO <sub>2</sub> by NIRS is an effective non-invasive tool for monitoring cerebral oxygenation during DFT-testing. However, specific values that would indicate cessation of circulation not reported. |
|---------|----------------------------------------------------------------------------------------------------------------------------------------------------------------------------------------------------------------------------------------------------------------------------------------------------------------------------------------------------------|

|                                 |                                                                                                                                                                                                                                                                                                                                                                                                                                                                                                                                                                                                                                                                                                                                                                                                                                                                                                                                                                                                       |
|---------------------------------|-------------------------------------------------------------------------------------------------------------------------------------------------------------------------------------------------------------------------------------------------------------------------------------------------------------------------------------------------------------------------------------------------------------------------------------------------------------------------------------------------------------------------------------------------------------------------------------------------------------------------------------------------------------------------------------------------------------------------------------------------------------------------------------------------------------------------------------------------------------------------------------------------------------------------------------------------------------------------------------------------------|
| Domain                          |                                                                                                                                                                                                                                                                                                                                                                                                                                                                                                                                                                                                                                                                                                                                                                                                                                                                                                                                                                                                       |
| Methods                         | <p><u>Country:</u> Canada</p> <p><u>Study aim:</u> To assess the feasibility of conducting a prospective, observational study of continuous monitoring of vital signs for 30 minutes after the clinical determination of death in five Canadian ICUs.</p> <p><u>Design:</u> Prospective observational</p> <p><u>Blinded:</u> No</p>                                                                                                                                                                                                                                                                                                                                                                                                                                                                                                                                                                                                                                                                   |
| Population                      | <p><u>Study population:</u> ICU WLST</p> <p><u>Includes pediatrics:</u> Yes</p> <p><u>Includes MAiD:</u> No</p> <p><u>Includes DCD:</u> No</p> <p><u>N (patients):</u> 30</p> <p><u>Age, mean/median (SD/Range):</u></p> <p>Pediatric site, in months (n = 4): 13.5 (range 1 to 25)</p> <p>Adult sites, in years (n = 37): 64 (range 30 to 90)</p>                                                                                                                                                                                                                                                                                                                                                                                                                                                                                                                                                                                                                                                    |
| Reference test                  | <p><u>Test type:</u> Invasive arterial line</p> <p><u>Test details:</u> No details on placement. Point of cessation of circulation determined by a minimum of 3 adjudicators.</p> <p><u>Definition of +/- circulation:</u> Cessation of waveform activity</p>                                                                                                                                                                                                                                                                                                                                                                                                                                                                                                                                                                                                                                                                                                                                         |
| Comparator test(s) description  | <p><u>Comparator test 1:</u> ECG</p> <p><u>Test details:</u> Continuous 3-lead electrocardiogram</p> <p><u>Definition of +/- circulation:</u> Determined by review by 3 adjudicators, isoelectric.</p> <p><u>Comparator test 2:</u> EEG</p> <p><u>Test details:</u> EEG monitoring was in place as standard of care in four patients (ALL ADULTS) at one study site. EEGs were recorded with a four-channel bipolar electroencephalogram monitor using four skin surface electrodes and a sub hairline montage. EEG waveform recordings were included for these subjects from withdrawal of life-sustaining therapies until 30 minutes after clinical declaration of death. Three adjudicators determined the time of isoelectric electroencephalogram and recorded any instances of resumption.</p> <p><u>Definition of +/- circulation:</u> Isoelectric EEG is a surrogate for cessation of circulation. Isoelectric electroencephalogram was defined as no activity greater than 2 microvolts.</p> |
| Outcomes for comparator test(s) | <p><b>ECG</b></p> <p><u>Sensitivity:</u> NR</p> <p><u>Specificity:</u> NR</p> <p><u>Definition of sensitivity:</u> NR</p> <p><u>Definition of specificity:</u> NR</p> <p><u>Reported false negative:</u> NR</p> <p><u>Reported false positive:</u> NR</p> <p><u>Definition of false negative:</u> NR</p> <p><u>Definition of false positive:</u> NR</p> <p><u>Additional details:</u> Findings are that 3/30 pts had ECG and art BP stop as same time. In 22 subjects, ECG activity persisted continuously for a median of 08:16 (mm:ss; range,</p>                                                                                                                                                                                                                                                                                                                                                                                                                                                   |

|                        |                                                                                                                                                                                                                                                                                                                                                                                                                                                                                                                                                                                                                                                                                                                                                                                                                                                                                                                                                                                                                                                                                                                                                                                                                                                                                                                                                                                                                                                                                                                                  |
|------------------------|----------------------------------------------------------------------------------------------------------------------------------------------------------------------------------------------------------------------------------------------------------------------------------------------------------------------------------------------------------------------------------------------------------------------------------------------------------------------------------------------------------------------------------------------------------------------------------------------------------------------------------------------------------------------------------------------------------------------------------------------------------------------------------------------------------------------------------------------------------------------------------------------------------------------------------------------------------------------------------------------------------------------------------------------------------------------------------------------------------------------------------------------------------------------------------------------------------------------------------------------------------------------------------------------------------------------------------------------------------------------------------------------------------------------------------------------------------------------------------------------------------------------------------|
|                        | <p>00:05–38:00) after absence of arterial blood pressure activity. In the other five subjects, electrocardiogram activity started and stopped intermittently for a median of 11:11 (mm:ss range, 00:37–36:29) after the absence of arterial blood pressure activity. Three subjects (10%, 3/30) (two of whom were children) had electrocardiogram activity that continued up to the end of the monitoring period. Considering these findings, ECG has no false positives but high false negative rate for arrest of circulation for death determination. The four children in this study had an isoelectric ECG that followed the last pulse by 0s (simultaneous), 11 min 11 s, 27 min 42 s and 36 min 29 s</p> <p><b>EEG</b><br/> <u>Sensitivity:</u> NR<br/> <u>Specificity:</u> NR<br/> <u>Definition of sensitivity:</u> NR<br/> <u>Definition of specificity:</u> NR<br/> <u>Reported false negative:</u> NR<br/> <u>Reported false positive:</u> NR<br/> <u>Definition of false negative:</u> NR<br/> <u>Definition of false positive:</u> NR<br/> <u>Additional details:</u> In three subjects, isoelectric electroencephalogram preceded the cessation of electrocardiogram and arterial blood pressure by 04:00, 10:00, 10:10 (mm:ss), respectively. In the remaining subject, delta and theta waveform activity persisted for 26:08 (mm:ss) after cessation of arterial blood pressure activity. Once ceased, no resumption of EEG activity was observed in any of the subjects during the full monitoring period.</p> |
| Thresholds             | <p><u>Outcome(s) on threshold for index test:</u> NR<br/> <u>Suggested threshold for index test:</u> NR</p>                                                                                                                                                                                                                                                                                                                                                                                                                                                                                                                                                                                                                                                                                                                                                                                                                                                                                                                                                                                                                                                                                                                                                                                                                                                                                                                                                                                                                      |
| Other relevant results | <p>Study was not designed to compare non-invasive method to arterial line, but it does provide data on this.</p>                                                                                                                                                                                                                                                                                                                                                                                                                                                                                                                                                                                                                                                                                                                                                                                                                                                                                                                                                                                                                                                                                                                                                                                                                                                                                                                                                                                                                 |

|                                 |                                                                                                                                                                                                                                                                                                                                                                                                                                                                                                                                                                                                                                                                                                                                                                                                                                                                                                                                                                                                              |
|---------------------------------|--------------------------------------------------------------------------------------------------------------------------------------------------------------------------------------------------------------------------------------------------------------------------------------------------------------------------------------------------------------------------------------------------------------------------------------------------------------------------------------------------------------------------------------------------------------------------------------------------------------------------------------------------------------------------------------------------------------------------------------------------------------------------------------------------------------------------------------------------------------------------------------------------------------------------------------------------------------------------------------------------------------|
| Domain                          |                                                                                                                                                                                                                                                                                                                                                                                                                                                                                                                                                                                                                                                                                                                                                                                                                                                                                                                                                                                                              |
| Methods                         | <p><u>Country:</u> Canada</p> <p><u>Study aim:</u> To describe the incidence and timing of resumption of cardiac electrical and pulsatile activity in critically ill adults who died after withdrawal of life-sustaining measures.</p> <p><u>Design:</u> Prospective observational</p> <p><u>Blinded:</u> No</p>                                                                                                                                                                                                                                                                                                                                                                                                                                                                                                                                                                                                                                                                                             |
| Population                      | <p><u>Study population:</u> ICU WLST with some DCD-eligible patients</p> <p><u>Includes pediatrics:</u> No</p> <p><u>Includes MAiD:</u> No</p> <p><u>Includes DCD:</u> Yes, controlled</p> <p><u>N (patients):</u> 480</p> <p><u>Age, mean/median (SD/Range):</u> Age of 480 pts with waveform review: 65 (15) years</p>                                                                                                                                                                                                                                                                                                                                                                                                                                                                                                                                                                                                                                                                                     |
| Reference test                  | <p><u>Test type:</u> Invasive arterial line</p> <p><u>Test details:</u> No details on placement. Point of cessation of circulation determined by at least 2 adjudicators.</p> <p><u>Definition of +/- circulation:</u> Pulse pressure of less than 5 mm Hg for at least 60 seconds.</p>                                                                                                                                                                                                                                                                                                                                                                                                                                                                                                                                                                                                                                                                                                                      |
| Comparator test(s) description  | <p><u>Comparator test 1:</u> ECG</p> <p><u>Test details:</u> Continuous 3-lead electrocardiogram</p> <p><u>Definition of +/- circulation:</u> Determined by review by at least 2 adjudicators when ECG is isoelectric (flat).</p>                                                                                                                                                                                                                                                                                                                                                                                                                                                                                                                                                                                                                                                                                                                                                                            |
| Outcomes for comparator test(s) | <p><b>ECG</b></p> <p><u>Sensitivity:</u> NR</p> <p><u>Specificity:</u> NR</p> <p><u>Definition of sensitivity:</u> NR</p> <p><u>Definition of specificity:</u> NR</p> <p><u>Reported false negative:</u> NR</p> <p><u>Reported false positive:</u> NR</p> <p><u>Definition of false negative:</u> NR</p> <p><u>Definition of false positive:</u> NR</p> <p><u>Additional details:</u> Results indicate a high rate of false negatives for ECG as only 19% of patients had ECG stop within 2 sec of cessation of arterial line. Cessation of cardiac electrical activity coincided within 2 seconds with the last arterial pulse of at least 5 mm Hg in 93 patients (19%). The median time between final arterial pulse and final QRS complex was 3 minutes 37 seconds (range, 0 seconds to 83 minutes 28 seconds). Cardiac electrical activity after the last arterial pulse was observed for more than 30 minutes in 33 of 480 patients (7%) and until the end of recording in 23 of 480 patients (5%).</p> |
| Thresholds                      | <p><u>Outcome(s) on threshold for index test:</u> NR</p> <p><u>Suggested threshold for index test:</u> NR</p>                                                                                                                                                                                                                                                                                                                                                                                                                                                                                                                                                                                                                                                                                                                                                                                                                                                                                                |
| Other relevant results          | <p>Study was not designed to compare non-invasive method to arterial line, but it does provide comparison of ECG to art line in large pop that includes our target population.</p>                                                                                                                                                                                                                                                                                                                                                                                                                                                                                                                                                                                                                                                                                                                                                                                                                           |

|                                 |                                                                                                                                                                                                                                                                                                                                                                                                                                                                                                                                                                                                                                                                                                                                                                                                                                                                                                                                   |
|---------------------------------|-----------------------------------------------------------------------------------------------------------------------------------------------------------------------------------------------------------------------------------------------------------------------------------------------------------------------------------------------------------------------------------------------------------------------------------------------------------------------------------------------------------------------------------------------------------------------------------------------------------------------------------------------------------------------------------------------------------------------------------------------------------------------------------------------------------------------------------------------------------------------------------------------------------------------------------|
| Domain                          |                                                                                                                                                                                                                                                                                                                                                                                                                                                                                                                                                                                                                                                                                                                                                                                                                                                                                                                                   |
| Methods                         | <p><u>Country:</u> Germany</p> <p><u>Study aim:</u> To evaluate the diagnostic accuracy and time required by first responders to assess the carotid pulse in potentially pulseless patients.</p> <p><u>Design:</u> Randomized trial</p> <p><u>Blinded:</u> Yes</p>                                                                                                                                                                                                                                                                                                                                                                                                                                                                                                                                                                                                                                                                |
| Population                      | <p><u>Study population:</u> Adults cardiopulmonary bypass</p> <p><u>Includes pediatrics:</u> No</p> <p><u>Includes MAiD:</u> No</p> <p><u>Includes DCD:</u> No</p> <p><u>N (patients):</u> 16</p> <p><u>Age, mean/median (SD/Range):</u></p> <p>Pulsatile: 59 (12) years</p> <p>Non-pulsatile: 58 (9) years</p>                                                                                                                                                                                                                                                                                                                                                                                                                                                                                                                                                                                                                   |
| Reference test                  | <p><u>Test type:</u> Invasive arterial line</p> <p><u>Test details:</u> No details on placement. Point of cessation of circulation determined by at least 2 adjudicators</p> <p><u>Definition of +/- circulation:</u> Pulseless = while on cardiopulmonary bypass</p>                                                                                                                                                                                                                                                                                                                                                                                                                                                                                                                                                                                                                                                             |
| Comparator test(s) description  | <p><u>Comparator test 1:</u> Palpable pulse</p> <p><u>Test details:</u> 1-min carotid pulse check by first responders</p> <p><u>Definition of +/- circulation:</u> NR</p>                                                                                                                                                                                                                                                                                                                                                                                                                                                                                                                                                                                                                                                                                                                                                         |
| Outcomes for comparator test(s) | <p><b>Palpable pulse</b></p> <p><u>Sensitivity:</u> No data for fully trained personnel, 90% for all (n=59)</p> <p><u>Specificity:</u> 89% for fully trained personnel (n=9), 55% for all, see Table 3 in study for breakdown of other first responders.</p> <p><u>Definition of sensitivity:</u> n(no pulse palpated, pulseless by reference)/n(pulseless by reference)</p> <p><u>Definition of specificity:</u> Detecting pulse in patients with pulsatile flow (carotid pulses were present and systolic radial artery pressure was &gt;80 mm Hg)</p> <p><u>Reported false negative:</u> NR</p> <p><u>Reported false positive:</u> NR</p> <p><u>Definition of false negative:</u> NR</p> <p><u>Definition of false positive:</u> NR</p> <p><u>Additional details:</u> False positive and false negative are not stated by authors but can be calculated from their data.</p> <p>FP: 45% overall</p> <p>FN: 10% for overall</p> |
| Thresholds                      | <p><u>Outcome(s) on threshold for index test:</u> NR</p> <p><u>Suggested threshold for index test:</u> NR</p>                                                                                                                                                                                                                                                                                                                                                                                                                                                                                                                                                                                                                                                                                                                                                                                                                     |
| Other relevant results          | <p>Study does not include target population and the population checking pulses was first responders at different training levels. It includes time component to the pulse checks, but findings do indicate that with palpable pulse there is a risk (11% fully trained, 45% overall) of determining that circulation has stopping when it hasn't (false positive).</p>                                                                                                                                                                                                                                                                                                                                                                                                                                                                                                                                                            |

**eAppendix 14**

Data abstraction of Genbrugge *et al.* 2017

|                                 |                                                                                                                                                                                                                                                                                                                                                                                                                                                                                                                                                                                                                                                                                                                                                            |
|---------------------------------|------------------------------------------------------------------------------------------------------------------------------------------------------------------------------------------------------------------------------------------------------------------------------------------------------------------------------------------------------------------------------------------------------------------------------------------------------------------------------------------------------------------------------------------------------------------------------------------------------------------------------------------------------------------------------------------------------------------------------------------------------------|
| Domain                          |                                                                                                                                                                                                                                                                                                                                                                                                                                                                                                                                                                                                                                                                                                                                                            |
| Methods                         | <p><u>Country:</u> Belgium</p> <p><u>Study aim:</u> To explore the regional cerebral oxygen saturation (rSO<sub>2</sub>) during the process of dying in Intensive Care Unit (ICU) patients in whom it was decided to withdraw life support.</p> <p><u>Design:</u> Case series</p> <p><u>Blinded:</u> No</p>                                                                                                                                                                                                                                                                                                                                                                                                                                                |
| Population                      | <p><u>Study population:</u> ICU patients undergoing withdrawal life support therapy</p> <p><u>Includes pediatrics:</u> No</p> <p><u>Includes MAiD:</u> No</p> <p><u>Includes DCD:</u> No</p> <p><u>N (patients):</u> 6</p> <p><u>Age, mean/median (SD/Range):</u> Mean 64 years, range (53-83)</p>                                                                                                                                                                                                                                                                                                                                                                                                                                                         |
| Reference test                  | <p><u>Test type:</u> Invasive arterial line</p> <p><u>Test details:</u> Arterial catheter in the radial artery</p> <p><u>Definition of +/- circulation:</u> Not stated but death defined as onset of asystole.</p>                                                                                                                                                                                                                                                                                                                                                                                                                                                                                                                                         |
| Comparator test(s) description  | <p><u>Comparator test 1:</u> NIRS</p> <p><u>Test details:</u> Regional cerebral saturation was measured until the patient died using a portable cerebral oximeter (SenSmartTMM Model X-100, Nonin Medical Inc, Plymouth, MN, USA and FORE-SIGHTTM technology, CAS Medical systems, Branford, CT, USA). Baseline rSO<sub>2</sub> value was calculated as mean value over one hour in stable haemodynamic conditions immediately after the decision of withdrawal of life support, before active treatment was stopped. Cerebral saturation values at one hour, 30 min and 15 min before death and at the moment of death were calculated as means of periods of 60 s around these specific time points.</p> <p><u>Definition of +/- circulation:</u> NR</p> |
| Outcomes for comparator test(s) | <p><b>NIRS</b></p> <p><u>Sensitivity:</u> NR</p> <p><u>Specificity:</u> NR</p> <p><u>Definition of sensitivity:</u> NR</p> <p><u>Definition of specificity:</u> NR</p> <p><u>Reported false negative:</u> NR</p> <p><u>Reported false positive:</u> NR</p> <p><u>Definition of false negative:</u> NR</p> <p><u>Definition of false positive:</u> NR</p> <p><u>Additional details:</u> The median rSO<sub>2</sub> measured one hour before death was 50% (35%–60%). At the time of death, median rSO<sub>2</sub> was 33% (7%–40%) (Fig. 1). Cerebral saturation and MAP were positively correlated, calculated during the last hour before death was clinically determined (r between 0.722–0.968; p &lt; 0.01) (Fig. 3).</p>                              |
| Thresholds                      | <p><u>Outcome(s) on threshold for index test:</u> NR</p> <p><u>Suggested threshold for index test:</u> NR</p>                                                                                                                                                                                                                                                                                                                                                                                                                                                                                                                                                                                                                                              |
| Other relevant results          | <p>Population is close to target for controlled DCD and this small case series provides evidence that rSO<sub>2</sub> cannot be used for death determination due to broad range of values at death</p>                                                                                                                                                                                                                                                                                                                                                                                                                                                                                                                                                     |

**eAppendix 15**

Data abstraction of Germanoska *et al.* 2018

|                                 |                                                                                                                                                                                                                                                                                                                                                                                                                                                                                                                                                                                                                                                                                                                                                                                                                                                                                                                                                                                                                                            |
|---------------------------------|--------------------------------------------------------------------------------------------------------------------------------------------------------------------------------------------------------------------------------------------------------------------------------------------------------------------------------------------------------------------------------------------------------------------------------------------------------------------------------------------------------------------------------------------------------------------------------------------------------------------------------------------------------------------------------------------------------------------------------------------------------------------------------------------------------------------------------------------------------------------------------------------------------------------------------------------------------------------------------------------------------------------------------------------|
| Domain                          |                                                                                                                                                                                                                                                                                                                                                                                                                                                                                                                                                                                                                                                                                                                                                                                                                                                                                                                                                                                                                                            |
| Methods                         | <p><u>Country:</u> Australia</p> <p><u>Study aim:</u> To investigate whether return of pulsatile flow in humans can be reliably assessed by common carotid artery ultrasound.</p> <p><u>Design:</u> Randomized pilot study</p> <p><u>Blinded:</u> Yes</p>                                                                                                                                                                                                                                                                                                                                                                                                                                                                                                                                                                                                                                                                                                                                                                                  |
| Population                      | <p><u>Study population:</u> All adult cardiac surgery patients with cardiopulmonary bypass</p> <p><u>Includes pediatrics:</u> No</p> <p><u>Includes MAiD:</u> No</p> <p><u>Includes DCD:</u> No</p> <p><u>N (patients):</u> 20 patients, 3 physician assessors; 10 had 2D US and 10 had colour US</p> <p><u>Age, mean/median (SD/Range):</u> median 66 (IQR 60–74 (range 39–84)) years</p>                                                                                                                                                                                                                                                                                                                                                                                                                                                                                                                                                                                                                                                 |
| Reference test                  | <p><u>Test type:</u> Invasive arterial line</p> <p><u>Test details:</u> Waveform of art line and ECG tracings were recorded using a cell phone and time stamped</p> <p><u>Definition of +/- circulation:</u> No, study was designed to look at return of pulsatile flow. The threshold of MAP for pulsatile flow was not reported.</p>                                                                                                                                                                                                                                                                                                                                                                                                                                                                                                                                                                                                                                                                                                     |
| Comparator test(s) description  | <p><u>Comparator test 1:</u> POCUS Pulse</p> <p><u>Test details:</u> 2D and colour US measurement of return of pulsatile flow in carotid artery. The US machines used were a Sonosite Mturbo (linear array probe, 13-6 MHz, Brookvale; New South Wales, Australia) and a Philips iE33 (linear array probe, 11-3 MHz, Philips Healthcare; North Ryde, Australia) depending on availability. See manuscript for further details on 2D vs colour and on assessor and assessment using US devices.</p> <p><u>Definition of +/- circulation:</u> Each reviewer watched the videos independently and recorded the timestamp at which they considered pulsatile flow to be first present in the carotid artery. For 2D US this was tissue distortion in the artery wall or surrounding tissue, for colour Doppler this was the colour change within the artery.</p> <p><u>Comparator test 2:</u> 2D or colour Doppler US</p> <p><u>Test details:</u> See comparator test 1</p> <p><u>Definition of +/- circulation:</u> See comparator test 1</p> |
| Outcomes for comparator test(s) | <p><b>POCUS Pulse</b></p> <p><u>Sensitivity:</u> NR</p> <p><u>Specificity:</u> NR</p> <p><u>Definition of sensitivity:</u> NR</p> <p><u>Definition of specificity:</u> NR</p> <p><u>Reported false negative:</u> NR</p> <p><u>Reported false positive:</u> NR</p> <p><u>Definition of false negative:</u> NR</p> <p><u>Definition of false positive:</u> NR</p> <p><u>Additional details:</u> The median (interquartile range (range)) mean arterial pressure where ultrasound flow occurred for two-dimensional ultrasound was 62mmHg (49–74 (33–82)) and 56mmHg (52–73 (43–83)) for colour Doppler. In our pilot study, two-dimensional ultrasound was reliable in detecting the return of pulsatile flow. The median difference between radial artery and ultrasound flow time (interquartile range (range)) was 24</p>                                                                                                                                                                                                                 |

|                        |                                                                                                                                                                                                                                                                                                                                                                                                                                                                                                                                                                                                                                                                                                                    |
|------------------------|--------------------------------------------------------------------------------------------------------------------------------------------------------------------------------------------------------------------------------------------------------------------------------------------------------------------------------------------------------------------------------------------------------------------------------------------------------------------------------------------------------------------------------------------------------------------------------------------------------------------------------------------------------------------------------------------------------------------|
|                        | <p>seconds (5–40 (0–93)) for two-dimensional and 5 seconds (2–17 (28 to 188)) for colour Doppler. The intraclass correlation coefficient for two-dimensional ultrasound was 0.86 (95%CI 0.63–0.96) and 0.32 (95%CI 0.01 to 0.71) for colour Doppler</p> <p><b>2D or Colour Doppler Ultrasound</b><br/> <u>Sensitivity:</u> NR<br/> <u>Specificity:</u> NR<br/> <u>Definition of sensitivity:</u> NR<br/> <u>Definition of specificity:</u> NR<br/> <u>Reported false negative:</u> NR<br/> <u>Reported false positive:</u> NR<br/> <u>Definition of false negative:</u> NR<br/> <u>Definition of false positive:</u> NR<br/> <u>Additional details:</u> See comparator test 1</p>                                  |
| Thresholds             | <p><u>Outcome(s) on threshold for index test:</u> None, but threshold levels of MAP were higher than for death determination<br/> <u>Suggested threshold for index test:</u> NR</p>                                                                                                                                                                                                                                                                                                                                                                                                                                                                                                                                |
| Other relevant results | <p>Study designed to see if US is better (more rapid and at lower MAP) than palpable pulse for pulse checks and if 2D or colour US better so provides only very indirect evidence for our SR.</p> <p>Main findings are: The median difference between radial artery and ultrasound flow time (interquartile range (range)) was 24 seconds (5–40 (0–93)) for two-dimensional and 5 seconds (2–17 (28 to 188)) for colour Doppler. The intraclass correlation coefficient for two-dimensional ultrasound was 0.86 (95%CI 0.63–0.96) and 0.32 (95%CI 0.01 to 0.71) for colour Doppler. The median (interquartile range (range)) mean arterial pressure where ultrasound flow occurred for two-dimensional images.</p> |



|                                 |                                                                                                                                                                                                                                                                                                                                                                                                                                                                                                                                                                                                                                                                                                                                                                                                                                                                                                                                                                               |
|---------------------------------|-------------------------------------------------------------------------------------------------------------------------------------------------------------------------------------------------------------------------------------------------------------------------------------------------------------------------------------------------------------------------------------------------------------------------------------------------------------------------------------------------------------------------------------------------------------------------------------------------------------------------------------------------------------------------------------------------------------------------------------------------------------------------------------------------------------------------------------------------------------------------------------------------------------------------------------------------------------------------------|
| Domain                          |                                                                                                                                                                                                                                                                                                                                                                                                                                                                                                                                                                                                                                                                                                                                                                                                                                                                                                                                                                               |
| Methods                         | <p><u>Country:</u> USA</p> <p><u>Study aim:</u> To determine a timeline of events associated with fatal organ failure and to identify EEG signatures associated with those events</p> <p><u>Design:</u> Retrospective review</p> <p><u>Blinded:</u> No</p>                                                                                                                                                                                                                                                                                                                                                                                                                                                                                                                                                                                                                                                                                                                    |
| Population                      | <p><u>Study population:</u> Adult neurological ICU cardiac death</p> <p><u>Includes pediatrics:</u> No</p> <p><u>Includes MAiD:</u> No</p> <p><u>Includes DCD:</u> No</p> <p><u>N (patients):</u> 19</p> <p><u>Age, mean/median (SD/Range):</u> Median 57 (IQR 45–82) years</p>                                                                                                                                                                                                                                                                                                                                                                                                                                                                                                                                                                                                                                                                                               |
| Reference test                  | <p><u>Test type:</u> Cerebral blood flow</p> <p><u>Test details:</u> Measurement that is based on HR and BP measured by invasive arterial line.</p> <p><u>Definition of +/- circulation:</u> Cessation of cerebral blood flow (CBF<sub>0</sub>) was assumed to occur following a permanent (1) heart rate of less than 20 beats per minute and (2) blood pressure below a set threshold as measured by the arterial line laced into the radial artery. Because blood pressure measures varied in availability between patients, this second criterion was met if at least one of the following subcriteria, as well as all others available, was observed: (2a) mean arterial pressure of less than 20 mm Hg, (2b) systolic blood pressure of less than 40 mm Hg, and (2c) diastolic blood pressure of less than 20 mm Hg. These thresholds were chosen because ventricular asystole [18] and EEG slowing [14] have been observed just below these blood pressure levels.</p> |
| Comparator test(s) description  | <p><u>Comparator test 1:</u> ECG</p> <p><u>Test details:</u> ECG recordings were obtained using a digital bedside video monitoring system (XLTEK; Excel-Tech Corp, Natus Medical Incorporated; Oakville, Ontario, Canada; low-pass filter = 70 Hz, highpass filter = 1 Hz, sampling rate = 200, 256, and 512 Hz)</p> <p><u>Definition of +/- circulation:</u> Last QRS complex (QRS<sub>0</sub>) was defined as the time of the final QRS complex with a clear R peak, as recorded on ECG, based on studies of QRS morphology as an indicator of cardiac dysfunction.</p>                                                                                                                                                                                                                                                                                                                                                                                                     |
| Outcomes for comparator test(s) | <p><b>NIRS</b></p> <p><u>Sensitivity:</u> NR</p> <p><u>Specificity:</u> NR</p> <p><u>Definition of sensitivity:</u> NR</p> <p><u>Definition of specificity:</u> NR</p> <p><u>Reported false negative:</u> NR</p> <p><u>Reported false positive:</u> NR</p> <p><u>Definition of false negative:</u> NR</p> <p><u>Definition of false positive:</u> NR</p> <p><u>Additional details:</u> QRS<sub>0</sub> (last QRS) occurred simultaneously or after (up to more than 40 minutes after in 1 case) cessation of cerebral blood flow (CBF<sub>0</sub>). See Figure 1. EEG<sub>0</sub> occurred at the time of QRS<sub>0</sub> in five patients and after QRS<sub>0</sub> in two patients (cohort median–2.0, interquartile range–8.0 to 0.0), whereas EEG<sub>0</sub> was seen at the time of CBF<sub>0</sub></p>                                                                                                                                                                 |

|                        |                                                                                                                                                                                                                                      |
|------------------------|--------------------------------------------------------------------------------------------------------------------------------------------------------------------------------------------------------------------------------------|
|                        | in six patients and following CBF <sub>0</sub> in 11 patients (cohort median 2.0 min, interquartile range-1.5 to 6.0).                                                                                                               |
| Thresholds             | <u>Outcome(s) on threshold for index test:</u> NR<br><u>Suggested threshold for index test:</u> NR                                                                                                                                   |
| Other relevant results | Study not designed to compare non-invasive monitoring but provides data on ECG compared to CFB <sub>0</sub> which is measured including invasive arterial line and shows that ECG can continue well beyond cessation of circulation. |

**eAppendix 17** Data abstraction of McNeill *et al.* 2005

|                                 |                                                                                                                                                                                                                                                                                                                                                                                                                                                                                                                                                                                                                                                                                                                       |
|---------------------------------|-----------------------------------------------------------------------------------------------------------------------------------------------------------------------------------------------------------------------------------------------------------------------------------------------------------------------------------------------------------------------------------------------------------------------------------------------------------------------------------------------------------------------------------------------------------------------------------------------------------------------------------------------------------------------------------------------------------------------|
| Domain                          |                                                                                                                                                                                                                                                                                                                                                                                                                                                                                                                                                                                                                                                                                                                       |
| Methods                         | <p><u>Country:</u> Canada</p> <p><u>Study aim:</u> To analyze cerebral cortical oxygenation during defibrillator threshold testing.</p> <p><u>Design:</u> Prospective trial</p> <p><u>Blinded:</u> No</p>                                                                                                                                                                                                                                                                                                                                                                                                                                                                                                             |
| Population                      | <p><u>Study population:</u> Adult ICD implantation</p> <p><u>Includes pediatrics:</u> No</p> <p><u>Includes MAiD:</u> No</p> <p><u>Includes DCD:</u> No</p> <p><u>N (patients):</u> 11</p> <p><u>Age, mean/median (SD/Range):</u> 64 ± 11</p>                                                                                                                                                                                                                                                                                                                                                                                                                                                                         |
| Reference test                  | <p><u>Test type:</u> Induced VF or VT, invasive arterial line present</p> <p><u>Test details:</u> ECG present. Arterial pressure measured continuously via a catheter placed in the nondominant radial artery.</p> <p><u>Definition of +/- circulation:</u> Absent circulation when in induced VF or VT. MAP less than 50 mmHg per results, but not defined by this.</p>                                                                                                                                                                                                                                                                                                                                              |
| Comparator test(s) description  | <p><u>Comparator test 1:</u> NIRS</p> <p><u>Test details:</u> Indirect measure of cerebral circulation: Cyt a,a3,HbO2, and Hb by NIRS. Hamamatsu NIRO 300 (Hamamatsu Photonics KK, Hamamatsu City, Japan) NIR spectrophotometer. This unit emitted light at four wavelengths (775, 810, 850, and 910 nm) from laser diodes, and directed them into the patient's head and brain from the right of the patient's forehead via a thin fiberoptic bundle attached to the skin by adhesive tape. Monitored continuously.</p> <p><u>Definition of +/- circulation:</u> NR</p>                                                                                                                                              |
| Outcomes for comparator test(s) | <p><b>NIRS</b></p> <p><u>Sensitivity:</u> NR</p> <p><u>Specificity:</u> NR</p> <p><u>Definition of sensitivity:</u> NR</p> <p><u>Definition of specificity:</u> NR</p> <p><u>Reported false negative:</u> NR</p> <p><u>Reported false positive:</u> NR</p> <p><u>Definition of false negative:</u> NR</p> <p><u>Definition of false positive:</u> NR</p> <p><u>Additional details:</u> Each episode of VF and VT resulted in a decrease in the mean arterial blood pressure to 23.9 ± 7.5 mmHg (p ≤ 0.05) and oxyhemoglobin (-4.2 ± 1.7 µmol/L; p ≤ 0.05) and an increase in de-oxyhemoglobin (2.7 ± 1.4 µmol/L). There was no change in the cytochrome c oxidase copper moiety redox status (0.09 ± 0.30 µmol/L)</p> |
| Thresholds                      | <p><u>Outcome(s) on threshold for index test:</u> NR</p> <p><u>Suggested threshold for index test:</u> NR</p>                                                                                                                                                                                                                                                                                                                                                                                                                                                                                                                                                                                                         |
| Other relevant results          | <p>Study not designed to compare non-invasive monitoring in population of interest, but it shows that at low MAP, certain indicators of cerebral hypoperfusion by NIRS are not reflective of this low flow state.</p>                                                                                                                                                                                                                                                                                                                                                                                                                                                                                                 |

|                                 |                                                                                                                                                                                                                                                                                                                                                                                                                                                                                                                                                                                                                                                                                                                                                                                                                                                                                                                                                       |
|---------------------------------|-------------------------------------------------------------------------------------------------------------------------------------------------------------------------------------------------------------------------------------------------------------------------------------------------------------------------------------------------------------------------------------------------------------------------------------------------------------------------------------------------------------------------------------------------------------------------------------------------------------------------------------------------------------------------------------------------------------------------------------------------------------------------------------------------------------------------------------------------------------------------------------------------------------------------------------------------------|
| Domain                          |                                                                                                                                                                                                                                                                                                                                                                                                                                                                                                                                                                                                                                                                                                                                                                                                                                                                                                                                                       |
| Methods                         | <p><u>Country:</u> Germany</p> <p><u>Study aim:</u> This study aimed at analyzing the relation of cerebral NIRS readings to vital parameters during CPB surgery in children at a minute scale by using a novel random-coefficient model.</p> <p><u>Design:</u> Prospective trial</p> <p><u>Blinded:</u> No</p>                                                                                                                                                                                                                                                                                                                                                                                                                                                                                                                                                                                                                                        |
| Population                      | <p><u>Study population:</u> Children undergoing cardiopulmonary-bypass cardiac surgery</p> <p><u>Includes pediatrics:</u> Yes</p> <p><u>Includes MAiD:</u> No</p> <p><u>Includes DCD:</u> No</p> <p><u>N (patients):</u> 10 (relevant subgroup of n=4 hypothermic circulatory arrest)</p> <p><u>Age, mean/median (SD/Range):</u> 6 days to 9 years</p>                                                                                                                                                                                                                                                                                                                                                                                                                                                                                                                                                                                                |
| Reference test                  | <p><u>Test type:</u> Hypothermic circulatory arrest</p> <p><u>Test details:</u> NR</p> <p><u>Definition of +/- circulation:</u> NR</p>                                                                                                                                                                                                                                                                                                                                                                                                                                                                                                                                                                                                                                                                                                                                                                                                                |
| Comparator test(s) description  | <p><u>Comparator test 1:</u> NIRS rSO<sub>2</sub></p> <p><u>Test details:</u> Forehead, Critikon Cerebral RedOx Monitor 2020; Johnson &amp; Johnson Medical, UK.</p> <p><u>Definition of +/- circulation:</u> NR</p>                                                                                                                                                                                                                                                                                                                                                                                                                                                                                                                                                                                                                                                                                                                                  |
| Outcomes for comparator test(s) | <p><b>NIRS</b></p> <p><u>Sensitivity:</u> NR</p> <p><u>Specificity:</u> NR</p> <p><u>Definition of sensitivity:</u> NR</p> <p><u>Definition of specificity:</u> NR</p> <p><u>Reported false negative:</u> NR</p> <p><u>Reported false positive:</u> NR</p> <p><u>Definition of false negative:</u> NR</p> <p><u>Definition of false positive:</u> NR</p> <p><u>Additional details:</u> Extracted data from Figure 2, initial NIRS was 54-69%, and nadir 51-59%.</p> <p>"With some interindividual differences, the nadir of complete cerebral rSO<sub>2</sub> deployment was estimated as 46.7–52.9 %. Patients no. 3, 8, and 9 started at a relatively high rSO<sub>2</sub> of 64–69 %, with consequently high rSO<sub>2</sub> reserve, and did not reach their estimated nadir during circulatory arrest (Fig. 2). In these three patients, the half-life T<sub>1/2</sub> of the exponential rSO<sub>2</sub> decay ranged from 5.2 to 9.0 min."</p> |
| Thresholds                      | <p><u>Outcome(s) on threshold for index test:</u> NR</p> <p><u>Suggested threshold for index test:</u> NR</p>                                                                                                                                                                                                                                                                                                                                                                                                                                                                                                                                                                                                                                                                                                                                                                                                                                         |
| Other relevant results          | <p>Study not designed to compare non-invasive monitoring in population of interest but it shows that at low MAP, certain indicators of cerebral hypoperfusion by NIRS are not reflective of this low flow state</p>                                                                                                                                                                                                                                                                                                                                                                                                                                                                                                                                                                                                                                                                                                                                   |

|                                 |                                                                                                                                                                                                                                                                                                                                                                                                                                                                                                                                                                                                                                                                                                                                                                                                   |
|---------------------------------|---------------------------------------------------------------------------------------------------------------------------------------------------------------------------------------------------------------------------------------------------------------------------------------------------------------------------------------------------------------------------------------------------------------------------------------------------------------------------------------------------------------------------------------------------------------------------------------------------------------------------------------------------------------------------------------------------------------------------------------------------------------------------------------------------|
| Domain                          |                                                                                                                                                                                                                                                                                                                                                                                                                                                                                                                                                                                                                                                                                                                                                                                                   |
| Methods                         | <p><u>Country:</u> Australia</p> <p><u>Study aim:</u> To conduct a diagnostic accuracy study of 2D ultrasound of the carotid artery for detection of the presence or absence of a pulse</p> <p><u>Design:</u> Prospective trial</p> <p><u>Blinded:</u> Yes</p>                                                                                                                                                                                                                                                                                                                                                                                                                                                                                                                                    |
| Population                      | <p><u>Study population:</u> Adults undergoing cardiopulmonary bypass cardiac surgery</p> <p><u>Includes pediatrics:</u> No</p> <p><u>Includes MAiD:</u> No</p> <p><u>Includes DCD:</u> No</p> <p><u>N (patients):</u> 23</p> <p><u>Age, mean/median (SD/Range):</u> Median 64 (IQR 14) years</p>                                                                                                                                                                                                                                                                                                                                                                                                                                                                                                  |
| Reference test                  | <p><u>Test type:</u> Invasive arterial line</p> <p><u>Test details:</u> No details on placement.</p> <p><u>Definition of +/- circulation:</u> "the presence/absence of an arterial waveform"</p>                                                                                                                                                                                                                                                                                                                                                                                                                                                                                                                                                                                                  |
| Comparator test(s) description  | <p><u>Comparator test 1:</u> POCUS Pulse</p> <p><u>Test details:</u> Carotid pule 2D Ultrasound. A researcher recorded the carotid artery ultrasound videos intra-operatively, which were then later read by critical care physicians from anaesthetic, emergency, and ICU.</p> <p><u>Definition of +/- circulation:</u> As read by physician. Training videos used beforehand for physicians.</p>                                                                                                                                                                                                                                                                                                                                                                                                |
| Outcomes for comparator test(s) | <p><b>POCUS Pulse</b></p> <p><u>Sensitivity:</u> 91% (95% CI 0.89-0.93)</p> <p><u>Specificity:</u> 90% (95% CI 0.86-0.93)</p> <p><u>Definition of sensitivity:</u> Sensitivity= n (pulse detected by POCUS, pulse present by art line)/ n(pulse present by art line).</p> <p><u>Definition of specificity:</u> Specificity = n (pulse absent by POCUS, pulse absent by art line)/ n(pulse absent by art line)</p> <p><u>Reported false negative:</u> NR</p> <p><u>Reported false positive:</u> NR</p> <p><u>Definition of false negative:</u> NR</p> <p><u>Definition of false positive:</u> NR</p> <p><u>Additional details:</u> Sensitivity was highest in the high-SBP group (&gt;90mmHg) (0.96, 95% CI 0.93 0.98) and lowest in the low-SBP group (&lt;70 mmHg) (0.83, 95% CI 0.78 0.87).</p> |
| Thresholds                      | <p><u>Outcome(s) on threshold for index test:</u> NR</p> <p><u>Suggested threshold for index test:</u> NR</p>                                                                                                                                                                                                                                                                                                                                                                                                                                                                                                                                                                                                                                                                                     |
| Other relevant results          | <p>Study does not include target population. Study is designed for diagnostic accuracy. Physician readers of test are reading pre-recorded videos done by someone else at a different time.</p>                                                                                                                                                                                                                                                                                                                                                                                                                                                                                                                                                                                                   |

|                                 |                                                                                                                                                                                                                                                                                                                                                                                                                                                                                                                                                                                                                                                                                                                                                                                                                                 |
|---------------------------------|---------------------------------------------------------------------------------------------------------------------------------------------------------------------------------------------------------------------------------------------------------------------------------------------------------------------------------------------------------------------------------------------------------------------------------------------------------------------------------------------------------------------------------------------------------------------------------------------------------------------------------------------------------------------------------------------------------------------------------------------------------------------------------------------------------------------------------|
| Domain                          |                                                                                                                                                                                                                                                                                                                                                                                                                                                                                                                                                                                                                                                                                                                                                                                                                                 |
| Methods                         | <p><u>Country:</u> Italy</p> <p><u>Study aim:</u> Compared the performance of three sites of pulse palpation (brachial, carotid, and femoral) for detecting and counting heartbeat in hypotensive infants.</p> <p><u>Design:</u> Prospective trial</p> <p><u>Blinded:</u> Yes</p>                                                                                                                                                                                                                                                                                                                                                                                                                                                                                                                                               |
| Population                      | <p><u>Study population:</u> Intraoperative infants</p> <p><u>Includes pediatrics:</u> Yes</p> <p><u>Includes MAiD:</u> No</p> <p><u>Includes DCD:</u> No</p> <p><u>N (patients):</u> 40</p> <p><u>Age, mean/median (SD/Range):</u> Mean 5.6 (SD 3.7) months</p>                                                                                                                                                                                                                                                                                                                                                                                                                                                                                                                                                                 |
| Reference test                  | <p><u>Test type:</u> Invasive arterial line</p> <p><u>Test details:</u> Radial artery</p> <p><u>Definition of +/- circulation:</u> No true cessation of circulation. Categorized as hypotensive or normotensive.</p>                                                                                                                                                                                                                                                                                                                                                                                                                                                                                                                                                                                                            |
| Comparator test(s) description  | <p><u>Comparator test 1:</u> Palpable pulse</p> <p><u>Test details:</u> Examiners (2 MD, 2 RN) had 10 s to find the pulse at three sites (brachial, femoral, carotid).</p> <p><u>Definition of +/- circulation:</u> As palpated pulse or no pulse.</p>                                                                                                                                                                                                                                                                                                                                                                                                                                                                                                                                                                          |
| Outcomes for comparator test(s) | <p><b>POCUS Pulse</b></p> <p><u>Sensitivity:</u> NR</p> <p><u>Specificity:</u> Brachial 41%, femoral 65%, carotid 52%</p> <p><u>Definition of sensitivity:</u> n(pulse detected by POCUS, pulse present by art line)/ n(pulse present by art line).</p> <p><u>Definition of specificity:</u> n(pulse by palpation, pulse on arterial line) / n(pulse on arterial line)</p> <p><u>Reported false negative:</u> NR</p> <p><u>Reported false positive:</u> NR</p> <p><u>Definition of false negative:</u> NR</p> <p><u>Definition of false positive:</u> NR</p> <p><u>Additional details:</u> Additional data for time to detection in Table 1. Overall agreement among the four observers was poor for femoral and carotid pulse detection (k=0.178 and 0.118, respectively) and fair for brachial pulse detection (k=0.221).</p> |
| Thresholds                      | <p><u>Outcome(s) on threshold for index test:</u> NR</p> <p><u>Suggested threshold for index test:</u> NR</p>                                                                                                                                                                                                                                                                                                                                                                                                                                                                                                                                                                                                                                                                                                                   |
| Other relevant results          | <p>Study does not include target population. Study is designed for diagnostic accuracy.</p>                                                                                                                                                                                                                                                                                                                                                                                                                                                                                                                                                                                                                                                                                                                                     |

|                                 |                                                                                                                                                                                                                                                                                                                                                                                                                                                                                                                                                                                                                                                                                                |
|---------------------------------|------------------------------------------------------------------------------------------------------------------------------------------------------------------------------------------------------------------------------------------------------------------------------------------------------------------------------------------------------------------------------------------------------------------------------------------------------------------------------------------------------------------------------------------------------------------------------------------------------------------------------------------------------------------------------------------------|
| Domain                          |                                                                                                                                                                                                                                                                                                                                                                                                                                                                                                                                                                                                                                                                                                |
| Methods                         | <p><u>Country:</u> USA</p> <p><u>Study aim:</u> To assess possibilities for improving the detection of the return of spontaneous circulation during in-hospital resuscitation.</p> <p><u>Design:</u> Case series</p> <p><u>Blinded:</u> No</p>                                                                                                                                                                                                                                                                                                                                                                                                                                                 |
| Population                      | <p><u>Study population:</u> Adult cardiac arrest</p> <p><u>Includes pediatrics:</u> No</p> <p><u>Includes MAiD:</u> No</p> <p><u>Includes DCD:</u> No</p> <p><u>N (patients):</u> 8</p> <p><u>Age, mean/median (SD/Range):</u> Calculated mean 62.3 years, reported range 35-79 years</p>                                                                                                                                                                                                                                                                                                                                                                                                      |
| Reference test                  | <p><u>Test type:</u> Palpable pulse</p> <p><u>Test details:</u> Site of pulse check not dictated.</p> <p><u>Definition of +/- circulation:</u> positive/negative pulse</p>                                                                                                                                                                                                                                                                                                                                                                                                                                                                                                                     |
| Comparator test(s) description  | <p><u>Comparator test 1:</u> POCUS Pulse</p> <p><u>Test details:</u> Doppler US, femoral location, Dipplex D900 Probe</p> <p><u>Definition of +/- circulation:</u> NR</p>                                                                                                                                                                                                                                                                                                                                                                                                                                                                                                                      |
| Outcomes for comparator test(s) | <p><b>POCUS Pulse</b></p> <p><u>Sensitivity:</u> NR</p> <p><u>Specificity:</u> NR</p> <p><u>Definition of sensitivity:</u> NR</p> <p><u>Definition of specificity:</u> NR</p> <p><u>Reported false negative:</u> NR</p> <p><u>Reported false positive:</u> NR</p> <p><u>Definition of false negative:</u> NR</p> <p><u>Definition of false positive:</u> NR</p> <p><u>Additional details:</u> Doppler-positive-palpation-negative pulse checks occurred in five of eight cases for an estimated incidence of 62.5% (95% CI, 29 to 96%). In 1/5 discordant cases, a radial artery catheter was successfully placed before repeating manual pulse check occurred, confirming pulsatile flow.</p> |
| Thresholds                      | <p><u>Outcome(s) on threshold for index test:</u> NR</p> <p><u>Suggested threshold for index test:</u> NR</p>                                                                                                                                                                                                                                                                                                                                                                                                                                                                                                                                                                                  |
| Other relevant results          | None.                                                                                                                                                                                                                                                                                                                                                                                                                                                                                                                                                                                                                                                                                          |

|                                 |                                                                                                                                                                                                                                                                                                                                                                                                                                                                                                                                                                                                                                                                                                                                                                                                                                                                                                                                                                                                                                                                                                                                                                   |
|---------------------------------|-------------------------------------------------------------------------------------------------------------------------------------------------------------------------------------------------------------------------------------------------------------------------------------------------------------------------------------------------------------------------------------------------------------------------------------------------------------------------------------------------------------------------------------------------------------------------------------------------------------------------------------------------------------------------------------------------------------------------------------------------------------------------------------------------------------------------------------------------------------------------------------------------------------------------------------------------------------------------------------------------------------------------------------------------------------------------------------------------------------------------------------------------------------------|
| Domain                          |                                                                                                                                                                                                                                                                                                                                                                                                                                                                                                                                                                                                                                                                                                                                                                                                                                                                                                                                                                                                                                                                                                                                                                   |
| Methods                         | <p><u>Country:</u> Germany</p> <p><u>Study aim:</u> To compare CNAP and IAP.</p> <p><u>Design:</u> Prospective trial</p> <p><u>Blinded:</u> No</p>                                                                                                                                                                                                                                                                                                                                                                                                                                                                                                                                                                                                                                                                                                                                                                                                                                                                                                                                                                                                                |
| Population                      | <p><u>Study population:</u> Adult intraoperative</p> <p><u>Includes pediatrics:</u> No</p> <p><u>Includes MAiD:</u> No</p> <p><u>Includes DCD:</u> No</p> <p><u>N (patients):</u> 33</p> <p><u>Age, mean/median (SD/Range):</u> Mean 82 (SD 4) years</p>                                                                                                                                                                                                                                                                                                                                                                                                                                                                                                                                                                                                                                                                                                                                                                                                                                                                                                          |
| Reference test                  | <p><u>Test type:</u> Invasive arterial line</p> <p><u>Test details:</u> 20-gage, radial location</p> <p><u>Definition of +/- circulation:</u> Absence of circulation during rapid ventricular pacing (180-200 per minute), blood pressure described as "approximately 40 mmHg", but no cut off given.</p>                                                                                                                                                                                                                                                                                                                                                                                                                                                                                                                                                                                                                                                                                                                                                                                                                                                         |
| Comparator test(s) description  | <p><u>Comparator test 1:</u> CNAP</p> <p><u>Test details:</u> CNAP™ (CNSystems Medizintechnik, Graz, Austria). this device monitors blood flow into the finger and translates blood flow oscillations sensed by encircling finger cuffs into a continuous pulse pressure waveform and beat-to-beat values of arterial blood pressure</p> <p><u>Definition of +/- circulation:</u> NR</p>                                                                                                                                                                                                                                                                                                                                                                                                                                                                                                                                                                                                                                                                                                                                                                          |
| Outcomes for comparator test(s) | <p><b>CNAP</b></p> <p><u>Sensitivity:</u> NR</p> <p><u>Specificity:</u> NR</p> <p><u>Definition of sensitivity:</u> NR</p> <p><u>Definition of specificity:</u> NR</p> <p><u>Reported false negative:</u> NR</p> <p><u>Reported false positive:</u> NR</p> <p><u>Definition of false negative:</u> NR</p> <p><u>Definition of false positive:</u> NR</p> <p><u>Additional details:</u> Overall CNAP accuracy (bias), calculated by subtracting IAP from CNAP, was <math>-6.3 \pm 18.9</math>, <math>7.4 \pm 10.5</math>, and <math>4.0 \pm 11.3</math> mmHg (mean <math>\pm</math> SD, systolic, diastolic, and mean). Bias increased during episodes of severe hypotension to <math>11.8 \pm 14.5</math>, <math>13.8 \pm 12.4</math>, and <math>12.9 \pm 12.4</math> mmHg. The percentage of agreements (95% confidence interval) between the blood pressure pairs with a difference <math>\leq 15</math> mmHg was 58.5% (57.9–58.6), 75.8% (75.5–76.0), 82.2% (81.9–82.4; systolic, diastolic, mean) for all data and 56.4% (54.2–58.9; <math>P = 0.71</math>), 53.2%* (51.1–56.0), and 57.4%* (56.3–59.1; *<math>P &lt; 0.001</math>) during rapid pacing.</p> |
| Thresholds                      | <p><u>Outcome(s) on threshold for index test:</u> NR</p> <p><u>Suggested threshold for index test:</u> NR</p>                                                                                                                                                                                                                                                                                                                                                                                                                                                                                                                                                                                                                                                                                                                                                                                                                                                                                                                                                                                                                                                     |
| Other relevant results          | None.                                                                                                                                                                                                                                                                                                                                                                                                                                                                                                                                                                                                                                                                                                                                                                                                                                                                                                                                                                                                                                                                                                                                                             |



|                                 |                                                                                                                                                                                                                                                                                                                                                                                                                                                                                                                                                                                                                                                                                                                                                                                                                                 |
|---------------------------------|---------------------------------------------------------------------------------------------------------------------------------------------------------------------------------------------------------------------------------------------------------------------------------------------------------------------------------------------------------------------------------------------------------------------------------------------------------------------------------------------------------------------------------------------------------------------------------------------------------------------------------------------------------------------------------------------------------------------------------------------------------------------------------------------------------------------------------|
| Domain                          |                                                                                                                                                                                                                                                                                                                                                                                                                                                                                                                                                                                                                                                                                                                                                                                                                                 |
| Methods                         | <p><u>Country:</u> Austria</p> <p><u>Study aim:</u> To test whether INVOS 3100 adequately responds to completely abolished perfusion of cerebral an extracerebral structures.</p> <p><u>Design:</u> Case-control</p> <p><u>Blinded:</u> No</p>                                                                                                                                                                                                                                                                                                                                                                                                                                                                                                                                                                                  |
| Population                      | <p><u>Study population:</u> Dead adults and healthy volunteers</p> <p><u>Includes pediatrics:</u> No</p> <p><u>Includes MAiD:</u> No</p> <p><u>Includes DCD:</u> No</p> <p><u>N (patients):</u> 18 dead, 15 volunteers (total n=33)</p> <p><u>Age, mean/median (SD/Range):</u></p> <p>Dead patients: Mean 74.4 (SD 14.6) years</p> <p>Healthy volunteers: Mean 34.2 (SD 8.7) years</p>                                                                                                                                                                                                                                                                                                                                                                                                                                          |
| Reference test                  | <p><u>Test type:</u> Clinical death exam, nothing for healthy volunteers</p> <p><u>Test details:</u> "Death was defined by irreversible cessation of heart and respiratory activity, loss of spontaneous motor movements and ophthalmic brainstem reflexes, and by the presence of livor mortis."</p> <p><u>Definition of +/- circulation:</u> Absence of circulation if dead. Present if healthy.</p>                                                                                                                                                                                                                                                                                                                                                                                                                          |
| Comparator test(s) description  | <p><u>Comparator test 1:</u> NIRS</p> <p><u>Test details:</u> INVOS 3100 near-infrared Cerebral Oximeter (Somanetics, USA), forehead prepped with dry cloth, skin prep swab, applied sensor so that a lateral margin of the sensor was at the midline of the forehead and the lower margin was 2cm above the eyebrows. Measurements repeated until at least 5 consecutive constant values were obtained.</p> <p><u>Definition of +/- circulation:</u> NR</p>                                                                                                                                                                                                                                                                                                                                                                    |
| Outcomes for comparator test(s) | <p><b>NIRS</b></p> <p><u>Sensitivity:</u> NR</p> <p><u>Specificity:</u> NR</p> <p><u>Definition of sensitivity:</u> NR</p> <p><u>Definition of specificity:</u> NR</p> <p><u>Reported false negative:</u> NR</p> <p><u>Reported false positive:</u> NR</p> <p><u>Definition of false negative:</u> NR</p> <p><u>Definition of false positive:</u> NR</p> <p><u>Additional details:</u> Table 2 in the study lists all rSO<sub>2</sub> values in dead subjects. Values ranged from 6-88% in dead subjects, and 60 to 76 in healthy volunteers. The mean of the two groups differed ((cases 51.0% (26.8) vs. controls 68.4% (5.2); p-0.029 Mann-Whitney rank sum test), but six of the 18 dead subjects had rSO<sub>2</sub> values at or above 60% (above the lowest values seen in normal controls). No threshold suggested.</p> |
| Thresholds                      | <p><u>Outcome(s) on threshold for index test:</u> NR</p> <p><u>Suggested threshold for index test:</u> NR</p>                                                                                                                                                                                                                                                                                                                                                                                                                                                                                                                                                                                                                                                                                                                   |
| Other relevant results          | None.                                                                                                                                                                                                                                                                                                                                                                                                                                                                                                                                                                                                                                                                                                                                                                                                                           |

|                                 |                                                                                                                                                                                                                                                                                                                                                                                                                                                                                                                                                            |
|---------------------------------|------------------------------------------------------------------------------------------------------------------------------------------------------------------------------------------------------------------------------------------------------------------------------------------------------------------------------------------------------------------------------------------------------------------------------------------------------------------------------------------------------------------------------------------------------------|
| Domain                          |                                                                                                                                                                                                                                                                                                                                                                                                                                                                                                                                                            |
| Methods                         | <p><u>Country:</u> Canada</p> <p><u>Study aim:</u> To describe a simple, novel technique for rapidly and accurately detecting the presence of a central pulse using POCUS for patients in cardiac arrest.</p> <p><u>Design:</u> Case series</p> <p><u>Blinded:</u> No</p>                                                                                                                                                                                                                                                                                  |
| Population                      | <p><u>Study population:</u> Adult cardiac arrest</p> <p><u>Includes pediatrics:</u> No</p> <p><u>Includes MAiD:</u> No</p> <p><u>Includes DCD:</u> No</p> <p><u>N (patients):</u> 4</p> <p><u>Age, mean/median (SD/Range):</u> Calculated mean 62 years, reported range 20-87 years</p>                                                                                                                                                                                                                                                                    |
| Reference test                  | <p><u>Test type:</u> Palpable pulse</p> <p><u>Test details:</u> NR</p> <p><u>Definition of +/- circulation:</u> Absence or presence of pulse</p>                                                                                                                                                                                                                                                                                                                                                                                                           |
| Comparator test(s) description  | <p><u>Comparator test 1:</u> POCUS Pulse</p> <p><u>Test details:</u> NR</p> <p><u>Definition of +/- circulation:</u> present circulation = non-compressible artery and pulsatile, absent = compressible artery</p>                                                                                                                                                                                                                                                                                                                                         |
| Outcomes for comparator test(s) | <p><b>POCUS Pulse</b></p> <p><u>Sensitivity:</u> NR</p> <p><u>Specificity:</u> NR</p> <p><u>Definition of sensitivity:</u> NR</p> <p><u>Definition of specificity:</u> NR</p> <p><u>Reported false negative:</u> NR</p> <p><u>Reported false positive:</u> NR</p> <p><u>Definition of false negative:</u> NR</p> <p><u>Definition of false positive:</u> NR</p> <p><u>Additional details:</u> Case 1, 3 and 4 describe a palpation-no pulse POCUS-positive pulse. Case 2 describes a palpation-indeterminate, POCUS-indeterminate then POCUS-no pulse.</p> |
| Thresholds                      | <p><u>Outcome(s) on threshold for index test:</u> NR</p> <p><u>Suggested threshold for index test:</u> NR</p>                                                                                                                                                                                                                                                                                                                                                                                                                                              |
| Other relevant results          | None.                                                                                                                                                                                                                                                                                                                                                                                                                                                                                                                                                      |

|                                 |                                                                                                                                                                                                                                                                                                                                                                                                                                                       |
|---------------------------------|-------------------------------------------------------------------------------------------------------------------------------------------------------------------------------------------------------------------------------------------------------------------------------------------------------------------------------------------------------------------------------------------------------------------------------------------------------|
| Domain                          |                                                                                                                                                                                                                                                                                                                                                                                                                                                       |
| Methods                         | <p><u>Country:</u> USA</p> <p><u>Study aim:</u> To describe a simple, novel technique for rapidly and accurately detecting the presence of a central pulse using POCUS for patients in cardiac arrest.</p> <p><u>Design:</u> Case series</p> <p><u>Blinded:</u> No</p>                                                                                                                                                                                |
| Population                      | <p><u>Study population:</u> Adult cardiac death</p> <p><u>Includes pediatrics:</u> No</p> <p><u>Includes MAiD:</u> No</p> <p><u>Includes DCD:</u> No</p> <p><u>N (patients):</u> 1</p> <p><u>Age, mean/median (SD/Range):</u> 64 years old</p>                                                                                                                                                                                                        |
| Reference test                  | <p><u>Test type:</u> Death/"heart stopped"</p> <p><u>Test details:</u> NR</p> <p><u>Definition of +/- circulation:</u> NR</p>                                                                                                                                                                                                                                                                                                                         |
| Comparator test(s) description  | <p><u>Comparator test 1:</u> NIRS</p> <p><u>Test details:</u> Somanetics INVOS 3100 cerebral oximeter, attached to forehead with self-adhesive material, recordings from one or both sides of a patient's forehead, recorded every 10-11 seconds.</p> <p><u>Definition of +/- circulation:</u> NR</p>                                                                                                                                                 |
| Outcomes for comparator test(s) | <p><b>POCUS Pulse</b></p> <p><u>Sensitivity:</u> NR</p> <p><u>Specificity:</u> NR</p> <p><u>Definition of sensitivity:</u> NR</p> <p><u>Definition of specificity:</u> NR</p> <p><u>Reported false negative:</u> NR</p> <p><u>Reported false positive:</u> NR</p> <p><u>Definition of false negative:</u> NR</p> <p><u>Definition of false positive:</u> NR</p> <p><u>Additional details:</u> The initial value of rSO<sub>2</sub> was quite low.</p> |
| Thresholds                      | <p><u>Outcome(s) on threshold for index test:</u> NR</p> <p><u>Suggested threshold for index test:</u> NR</p>                                                                                                                                                                                                                                                                                                                                         |
| Other relevant results          | None.                                                                                                                                                                                                                                                                                                                                                                                                                                                 |

|                                 |                                                                                                                                                                                                                                                                                                                                                                                                                                                                                                                                                                                                                                                                                                                                                                                                                                                                                                                                                                                                                                                                                                                                                                                                                                                                                                                                                                                                                                                                                                                                                                                                                                                                                                                                                                                |
|---------------------------------|--------------------------------------------------------------------------------------------------------------------------------------------------------------------------------------------------------------------------------------------------------------------------------------------------------------------------------------------------------------------------------------------------------------------------------------------------------------------------------------------------------------------------------------------------------------------------------------------------------------------------------------------------------------------------------------------------------------------------------------------------------------------------------------------------------------------------------------------------------------------------------------------------------------------------------------------------------------------------------------------------------------------------------------------------------------------------------------------------------------------------------------------------------------------------------------------------------------------------------------------------------------------------------------------------------------------------------------------------------------------------------------------------------------------------------------------------------------------------------------------------------------------------------------------------------------------------------------------------------------------------------------------------------------------------------------------------------------------------------------------------------------------------------|
| Domain                          |                                                                                                                                                                                                                                                                                                                                                                                                                                                                                                                                                                                                                                                                                                                                                                                                                                                                                                                                                                                                                                                                                                                                                                                                                                                                                                                                                                                                                                                                                                                                                                                                                                                                                                                                                                                |
| Methods                         | <p><u>Country:</u> Australia</p> <p><u>Study aim:</u> To determine time and accuracy diagnosing paediatric cardiac arrest (CA) by pulse palpation.</p> <p><u>Design:</u> Prospective trial</p> <p><u>Blinded:</u> Yes</p>                                                                                                                                                                                                                                                                                                                                                                                                                                                                                                                                                                                                                                                                                                                                                                                                                                                                                                                                                                                                                                                                                                                                                                                                                                                                                                                                                                                                                                                                                                                                                      |
| Population                      | <p><u>Study population:</u> Children in ICU on ECLS and/or cardiac failure</p> <p><u>Includes pediatrics:</u> Yes</p> <p><u>Includes MAiD:</u> No</p> <p><u>Includes DCD:</u> No</p> <p><u>N (patients):</u> 17</p> <p><u>Age, mean/median (SD/Range):</u> Range of 1 day to 11 years.</p>                                                                                                                                                                                                                                                                                                                                                                                                                                                                                                                                                                                                                                                                                                                                                                                                                                                                                                                                                                                                                                                                                                                                                                                                                                                                                                                                                                                                                                                                                     |
| Reference test                  | <p><u>Test type:</u> Invasive arterial line and 'unhurried palpation'</p> <p><u>Test details:</u> The presence or absence of a true pulse was determined by the investigators and the bedside nurse using unhurried palpation and observation of invasively monitored blood pressure and pulse pressure (if any). In results, they specify that all patients had arterial lines.</p> <p><u>Definition of +/- circulation:</u> Research team decision, no defined pulse pressure.</p>                                                                                                                                                                                                                                                                                                                                                                                                                                                                                                                                                                                                                                                                                                                                                                                                                                                                                                                                                                                                                                                                                                                                                                                                                                                                                           |
| Comparator test(s) description  | <p><u>Comparator test 1:</u> Palpable pulse</p> <p><u>Test details:</u> Doctor or nurse (153 total, 14 repeat from previous study). Rescuers were instructed to palpate the brachial pulse on the side opposite the deployment of the ECLS apparatus (for ease of access) and to decide if pulse was present or absent</p> <p><u>Definition of +/- circulation:</u> Present/absent palpable pulse</p>                                                                                                                                                                                                                                                                                                                                                                                                                                                                                                                                                                                                                                                                                                                                                                                                                                                                                                                                                                                                                                                                                                                                                                                                                                                                                                                                                                          |
| Outcomes for comparator test(s) | <p><b>Palpable pulse</b></p> <p><u>Sensitivity:</u> 76 (95% CI 64-86)</p> <p><u>Specificity:</u> 79% (95% CI 0.69-0.86)</p> <p><u>Definition of sensitivity:</u> In this study in which the disease is cardiac arrest, the positive test which confirms it is the absence of a pulse. Thus, when no true pulse was present, rescuer responses were classified as either true positive (TP) ("pulse absent") or false negative (FN) ("pulse present"). When a true pulse was present, rescuer response were classified as either true negative (TN) ("pulse present") or false positive (FP) ("pulse absent"). Sensitivity (TP/(TP + FN), specificity (TN/(TN + FP) and accuracy of responses (TP + TN/total) were calculated</p> <p><u>Definition of specificity:</u> See "Definition of sensitivity".</p> <p><u>Reported false negative:</u> 13/55</p> <p><u>Reported false positive:</u> 21/98</p> <p><u>Definition of false negative:</u> See "Definition of sensitivity".</p> <p><u>Definition of false positive:</u> See "Definition of sensitivity".</p> <p><u>Additional details:</u> CA on 55 occasions was diagnosed by 42 (76%) rescuers in mean (<math>\pm</math>SD) time <math>30 \pm 19</math> s. Experienced rescuers diagnosed CA in <math>25 \pm 14</math> s, inexperienced rescuers in <math>37 \pm 24</math> s (<math>p = 0.042</math>). CA absent on 98 occasions was confirmed by 77 (79%) rescuers in <math>13 \pm 13</math> s. Experienced rescuers confirmed absent CA in <math>9 \pm 5</math> s, inexperienced rescuers in <math>21 \pm 19</math> s (<math>p = 0.0001</math>). Diagnosis of CA compared to confirmation of absence took longer by all rescuers (<math>p &lt; 0.0001</math>), experienced rescuers (<math>p &lt; 0.0001</math>) and</p> |

|                        |                                                                                                                                                                                                                                                                                                   |
|------------------------|---------------------------------------------------------------------------------------------------------------------------------------------------------------------------------------------------------------------------------------------------------------------------------------------------|
|                        | inexperienced rescuers ( $p = 0.018$ ). 28 of 33 (85%) experienced doctors diagnosed CA or confirmed absence in $13 \pm 9$ s, 49 of 61 (80%) experienced nurses in $15 \pm 12$ s, 11 of 21 (52%) inexperienced nurses in $18 \pm 15$ s and 31 of 38 (82%) inexperienced doctors in $30 \pm 24$ s. |
| Thresholds             | <u>Outcome(s) on threshold for index test: NR</u><br><u>Suggested threshold for index test: NR</u>                                                                                                                                                                                                |
| Other relevant results | None.                                                                                                                                                                                                                                                                                             |

|                                 |                                                                                                                                                                                                                                                                                                                                                                                                                                                                                                                                                                                                                                                                                                                                                                                                                                                                                                                                                                                                                                                                                                                                                                                                                                                                                                                                                                              |
|---------------------------------|------------------------------------------------------------------------------------------------------------------------------------------------------------------------------------------------------------------------------------------------------------------------------------------------------------------------------------------------------------------------------------------------------------------------------------------------------------------------------------------------------------------------------------------------------------------------------------------------------------------------------------------------------------------------------------------------------------------------------------------------------------------------------------------------------------------------------------------------------------------------------------------------------------------------------------------------------------------------------------------------------------------------------------------------------------------------------------------------------------------------------------------------------------------------------------------------------------------------------------------------------------------------------------------------------------------------------------------------------------------------------|
| Domain                          |                                                                                                                                                                                                                                                                                                                                                                                                                                                                                                                                                                                                                                                                                                                                                                                                                                                                                                                                                                                                                                                                                                                                                                                                                                                                                                                                                                              |
| Methods                         | <p><u>Country:</u> Australia</p> <p><u>Study aim:</u> To determine the reliability of pulse palpation to diagnose paediatric cardiac arrest.</p> <p><u>Design:</u> Prospective trial</p> <p><u>Blinded:</u> Yes</p>                                                                                                                                                                                                                                                                                                                                                                                                                                                                                                                                                                                                                                                                                                                                                                                                                                                                                                                                                                                                                                                                                                                                                          |
| Population                      | <p><u>Study population:</u> Children in ICU on ECLS and/or cardiac failure</p> <p><u>Includes pediatrics:</u> Yes</p> <p><u>Includes MAiD:</u> No</p> <p><u>Includes DCD:</u> No</p> <p><u>N (patients):</u> 16</p> <p><u>Age, mean/median (SD/Range):</u> Mean 1.8 years, range (1 week to 13 years)</p>                                                                                                                                                                                                                                                                                                                                                                                                                                                                                                                                                                                                                                                                                                                                                                                                                                                                                                                                                                                                                                                                    |
| Reference test                  | <p><u>Test type:</u> Invasive arterial line and “unhurried palpation”</p> <p><u>Test details:</u> The presence or absence of a true pulse was determined by the investigators and the bedside nurse using unhurried palpation and observation of invasively monitored blood pressure and pulse pressure (if any). In the results, they specify that all patients had arterial lines.</p> <p><u>Definition of +/- circulation:</u> Research team decision, no defined pulse pressure</p>                                                                                                                                                                                                                                                                                                                                                                                                                                                                                                                                                                                                                                                                                                                                                                                                                                                                                      |
| Comparator test(s) description  | <p><u>Comparator test 1:</u> Palpable pulse</p> <p><u>Test details:</u> Doctor or nurse (209 total). Rescuers were instructed to palpate any pulse of their choice excluding the cardiac apex, and to attempt a decision of “pulse present” or “pulse absent” within 10s</p> <p><u>Definition of +/- circulation:</u> Present/absent palpable pulse</p>                                                                                                                                                                                                                                                                                                                                                                                                                                                                                                                                                                                                                                                                                                                                                                                                                                                                                                                                                                                                                      |
| Outcomes for comparator test(s) | <p><b>Palpable pulse</b></p> <p><u>Sensitivity:</u> 86% (95% CI 77-90)</p> <p><u>Specificity:</u> 64% (95% CI 53-74)</p> <p><u>Definition of sensitivity:</u> Rescuers responses were classified as either true positive (TP) (“pulse absent”) or false negative (FN) (“pulse present”) when a true pulse was absent, and as either true negative (TN) (“pulse present”) or false positive (FP) (“pulse absent”) when a true pulse was present. Sensitivity TP/(TP + FN), specificity TN/(TN + FP) and accuracy of responses TP + TN/total.</p> <p><u>Definition of specificity:</u> See “Definition of sensitivity”.</p> <p><u>Reported false negative:</u> 18/128</p> <p><u>Reported false positive:</u> 29/81</p> <p><u>Definition of false negative:</u> See “Definition of sensitivity”.</p> <p><u>Definition of false positive:</u> See “Definition of sensitivity”.</p> <p><u>Additional details:</u> When investigators diagnosed cardiac arrest pulse pressure was <math>6 \pm 5</math> mmHg (range 0–20) compared with <math>9 \pm 8</math> mmHg (range 0–29) with rescuers (<math>p = 0.0004</math>). With pulse pressure zero, rescuer accuracy was 89% and sensitivity 0.89. Sixty per cent of rescuers chose a brachial pulse, 33% a femoral pulse with respective accuracies of 78% and 77%, sensitivities 0.86 and 0.85 and specificities 0.67 and 0.56.</p> |
| Thresholds                      | <p><u>Outcome(s) on threshold for index test:</u> NR</p> <p><u>Suggested threshold for index test:</u> NR</p>                                                                                                                                                                                                                                                                                                                                                                                                                                                                                                                                                                                                                                                                                                                                                                                                                                                                                                                                                                                                                                                                                                                                                                                                                                                                |
| Other relevant                  | None.                                                                                                                                                                                                                                                                                                                                                                                                                                                                                                                                                                                                                                                                                                                                                                                                                                                                                                                                                                                                                                                                                                                                                                                                                                                                                                                                                                        |

|         |  |
|---------|--|
| results |  |
|---------|--|

|                                 |                                                                                                                                                                                                                                                                                                                                                                                                                                                                                                                                                                                                                                                                                                                                                                                                                                                                                                                                                                                                                                                                                               |
|---------------------------------|-----------------------------------------------------------------------------------------------------------------------------------------------------------------------------------------------------------------------------------------------------------------------------------------------------------------------------------------------------------------------------------------------------------------------------------------------------------------------------------------------------------------------------------------------------------------------------------------------------------------------------------------------------------------------------------------------------------------------------------------------------------------------------------------------------------------------------------------------------------------------------------------------------------------------------------------------------------------------------------------------------------------------------------------------------------------------------------------------|
| Domain                          |                                                                                                                                                                                                                                                                                                                                                                                                                                                                                                                                                                                                                                                                                                                                                                                                                                                                                                                                                                                                                                                                                               |
| Methods                         | <p><u>Country:</u> Turkey</p> <p><u>Study aim:</u> To compare the efficiency of cardiac ultrasonography (CUSG), Doppler ultrasonography (DUSG), and manual pulse palpation methods to check the pulse in CA patients.</p> <p><u>Design:</u> Prospective observational</p> <p><u>Blinded:</u> Not stated as blinded. Curtain used between US/pulse check.</p>                                                                                                                                                                                                                                                                                                                                                                                                                                                                                                                                                                                                                                                                                                                                  |
| Population                      | <p><u>Study population:</u> Adult cardiopulmonary arrest ED</p> <p><u>Includes pediatrics:</u> No</p> <p><u>Includes MAiD:</u> No</p> <p><u>Includes DCD:</u> No</p> <p><u>N (patients):</u> 137 patients, 2 doctors performing US</p> <p><u>Age, mean/median (SD/Range):</u> Mean 63.4 (SD 16.8) years</p>                                                                                                                                                                                                                                                                                                                                                                                                                                                                                                                                                                                                                                                                                                                                                                                   |
| Reference test                  | <p><u>Test type:</u> Cardiac US</p> <p><u>Test details:</u> max 10 s</p> <p><u>Definition of +/- circulation:</u> "cardiac kinetic motion" = present circulation</p>                                                                                                                                                                                                                                                                                                                                                                                                                                                                                                                                                                                                                                                                                                                                                                                                                                                                                                                          |
| Comparator test(s) description  | <p><u>Comparator test 1:</u> Palpable pulse</p> <p><u>Test details:</u> Max 10s between pulse checks, femoral</p> <p><u>Definition of +/- circulation:</u> Present/absent palpable pulse</p> <p><u>Comparator test 2:</u> POCUS Pulse</p> <p><u>Test details:</u> Doppler US femoral, max 10s between pulse checks</p> <p><u>Definition of +/- circulation:</u> NR</p>                                                                                                                                                                                                                                                                                                                                                                                                                                                                                                                                                                                                                                                                                                                        |
| Outcomes for comparator test(s) | <p><b>Palpable pulse</b></p> <p><u>Sensitivity:</u> NR</p> <p><u>Specificity:</u> NR</p> <p><u>Definition of sensitivity:</u> NR</p> <p><u>Definition of specificity:</u> See "Definition of sensitivity".</p> <p><u>Reported false negative:</u> False negative 100%, 28% and 0% at first, second and last pulse checks.</p> <p><u>Reported false positive:</u> False-positive 5.3%, 3.5% and 0% at first, second and last pulse checks.</p> <p><u>Definition of false negative:</u> n(no pulse palpated, CUS positive movement)/n(CUS positive movement)</p> <p><u>Definition of false positive:</u> n(pulse palpated, CUS no movement)/n(CUS no movement)</p> <p><u>Additional details:</u> CUS used as gold-standard. Full data available in Table 2 in study.</p> <p><b>POCUS Pulse</b></p> <p><u>Sensitivity:</u> NR</p> <p><u>Specificity:</u> NR</p> <p><u>Definition of sensitivity:</u> NR</p> <p><u>Definition of specificity:</u> See "Definition of sensitivity"</p> <p><u>Reported false negative:</u> False-negative 28.5%, 12% and 10.3% at first, second and last check.</p> |



|                        |                                                                                                                                                                                                                                                                                                                                                                                                                                                             |
|------------------------|-------------------------------------------------------------------------------------------------------------------------------------------------------------------------------------------------------------------------------------------------------------------------------------------------------------------------------------------------------------------------------------------------------------------------------------------------------------|
|                        | <u>Reported false positive:</u> False-positive 0.7%, 2.6%, 0.9% at first, second and last check<br><u>Definition of false negative:</u> $n(\text{no Doppler pulse present, CUS positive movement})/n(\text{CUS(positive movement)})$<br><u>Definition of false positive:</u> $n(\text{Doppler pulse present, CUS no movement})/n(\text{CUS no movement})$<br><u>Additional details:</u> CUS used as gold-standard. Full data available in Table 2 in study. |
| Thresholds             | <u>Outcome(s) on threshold for index test:</u> NR<br><u>Suggested threshold for index test:</u> NR                                                                                                                                                                                                                                                                                                                                                          |
| Other relevant results | None.                                                                                                                                                                                                                                                                                                                                                                                                                                                       |

2D = two-dimensional; CA = cardiac arrest; CI = confidence interval; CNAP = continuous non-invasive arterial pressure; DCD = donation after circulatory death; ECG = electrocardiogram; ECLS = extracorporeal life support; ED/ER = emergency department/room; EEG = electroencephalogram; EF = ejection fraction; IAP = invasive arterial pressure; ICU = intensive care unit; IQR = interquartile range; MAiD = medical assistance in dying; NIRS = near-infrared spectroscopy; NR = not reported; PICU = pediatric intensive care unit; POCUS = point-of-care ultrasound; SD = standard deviation; US = ultrasound/ultrasonography; UT = ultrasound-tagged; VF = ventricular fibrillation; VT = ventricular tachycardia; WLST = withdrawal of life-sustaining therapy
